# Supplementary material for: Genome-wide redistribution of 24-nt siRNAs in rice gametes
Source: HighWire-hosted journal article supplement (doi:10.1101/gr.253674.119), 2020-01-02
Supplement: Supplemental_Dataset_1.xlsx [file Supplemental_Dataset_1.xlsx]

## Sheet: miRNA read counts
miR	B15	B20	B25	BS1	BS2	BS4a	BS4b	BS6a	BS6b	E2	E3	E4	E9a	E9b	E9c	OV1a	OV1b	OV2	SD4	SP5b	SP5c
osa-miR1861o	0	0	0	0	0	0	0	0	0	0	0	0	0	0	0	0	0	0	0	0	0
osa-miR1859	2671	1814	2495	2	13	0	0	0	0	3	0	0	9	2	0	6	16	57	1675	0	2
osa-miR531b	0	0	0	0	0	0	0	0	0	0	0	0	0	0	0	0	0	0	0	0	0
osa-miR1860-3p	1	2	4	0	0	0	0	0	0	0	0	0	0	0	0	0	0	0	0	0	0
osa-miR1860-5p	16	12	13	10	0	0	0	0	0	0	0	0	0	0	1	0	0	1	0	3	2
osa-miR159b	35775	30245	34765	2692	1119	7	45	61	137	5356	2425	7281	1788	2186	2106	20503	20826	20264	33803	2262	2858
osa-miR5824	1	3	2	0	0	0	0	0	0	0	0	0	0	0	0	0	0	0	0	0	0
osa-miR2120b-5p	0	0	0	1	0	0	0	0	0	0	0	0	1	0	0	0	0	0	0	0	0
osa-miR2120b-3p	0	0	0	0	0	0	0	0	0	0	0	0	0	0	0	0	0	0	0	0	0
osa-miR393a	34	7	21	0	0	0	0	0	0	0	0	0	0	0	0	0	0	0	10	0	0
osa-miR5494	0	0	0	0	0	0	0	0	0	0	0	0	0	0	0	0	0	1	0	0	0
osa-miR5521	0	0	0	0	0	0	0	0	0	0	0	0	0	0	0	0	0	0	0	0	0
osa-miR5830	44	17	34	2	0	0	0	0	0	0	0	0	0	0	1	0	0	0	6	3	1
osa-miR156c-5p	1959	1521	1879	97	36	19	15	36	31	34	36	30	5	7	19	77	70	115	1638	22	33
osa-miR156c-3p	409	234	247	1	0	10	1	0	0	4	1	0	0	0	0	3	0	6	283	0	0
osa-miR156b-5p	2024	1544	1804	100	28	24	23	44	55	30	31	34	2	7	9	74	71	127	1597	30	37
osa-miR156b-3p	10	8	14	0	0	0	0	0	0	0	0	0	0	0	0	0	0	0	8	0	0
osa-miR1431	8	4	4	0	0	0	0	0	0	0	0	0	0	0	0	0	0	0	0	0	0
osa-miR5817	0	0	0	0	0	0	0	0	0	0	0	0	0	0	0	0	0	0	0	0	0
osa-miR2096-5p	0	0	0	0	0	0	0	0	0	0	0	0	0	0	0	0	0	0	0	0	0
osa-miR2096-3p	0	0	0	0	0	0	0	0	0	0	0	0	0	0	0	0	0	0	0	0	0
osa-miR159c	26	16	15	4	1	0	0	0	0	9	8	16	0	3	5	21	21	11	27	0	1
osa-miR159d	217	120	185	12	2	0	0	0	2	53	27	87	9	12	16	194	208	264	414	3	2
osa-miR319b	4209	2366	3925	22	20	0	1	2	22	54	105	114	10	9	4	421	381	485	1329	20	18
osa-miR159f	9389	7764	9793	63	69	2	34	3	32	492	160	521	102	108	91	905	880	760	7740	74	92
osa-miR1426	0	0	0	0	0	0	0	0	0	0	0	0	0	0	0	0	0	0	0	0	0
osa-miR5143b	85	69	96	27	0	0	2	2	48	0	0	0	0	2	0	0	3	1	57	2	9
osa-miR5143a	110	102	122	18	0	1	1	1	41	0	0	0	1	0	3	0	2	0	77	7	8
osa-miR169a	0	0	0	0	0	0	0	0	0	0	0	0	0	0	0	0	0	0	0	0	0
osa-miR2097-5p	0	0	0	0	0	0	0	0	0	0	0	0	0	0	0	0	0	0	0	0	0
osa-miR2097-3p	0	1	1	0	0	0	0	0	0	0	0	0	0	0	0	0	0	0	0	0	0
osa-miR159e	31	25	51	2	0	0	0	3	1	16	10	20	1	4	3	21	25	18	36	4	2
osa-miR11339-5p	1	0	0	0	0	0	0	0	0	0	0	0	0	0	0	0	0	0	0	0	0
osa-miR11339-3p	0	0	0	0	0	0	0	0	0	0	0	0	0	0	0	0	0	0	0	0	0
osa-miR7695-3p	1	0	2	0	0	0	0	0	0	0	0	0	0	0	0	0	0	0	0	0	0
osa-miR7695-5p	0	0	0	0	0	0	0	0	0	0	0	0	0	0	0	0	0	0	0	0	0
osa-miR5812	0	0	0	0	0	0	0	0	0	0	0	0	0	0	0	0	0	0	0	0	0
osa-miR2924	0	0	0	0	0	0	0	0	0	0	0	0	0	0	0	0	0	0	0	0	0
osa-miR408-5p	13	11	4	0	0	0	0	0	0	1	1	10	0	0	0	0	1	3	17	0	0
osa-miR408-3p	131	62	94	2	0	0	0	0	0	26	5	85	2	11	8	22	18	6	39	2	2
osa-miR5802	3	0	0	0	0	0	0	0	0	0	0	0	0	0	0	0	0	0	0	0	0
osa-miR1428a-5p	0	0	0	0	0	0	0	0	0	0	0	0	0	0	0	0	0	0	0	0	0
osa-miR1428a-3p	1	0	0	0	0	0	0	0	0	0	0	0	0	0	0	0	0	0	0	0	0
osa-miR820a	880	699	733	33	4	1	1	18	18	7	4	12	1	1	2	20	20	8	248	7	16
osa-miR1861a	0	0	0	0	0	0	0	0	0	0	0	0	0	0	0	0	0	0	0	0	0
osa-miR2121a	1	1	2	1	0	2	0	0	0	0	0	0	0	0	0	0	0	0	1	0	0
osa-miR159a.2	24	6	20	0	0	0	0	0	0	0	0	0	0	0	0	0	0	0	0	0	0
osa-miR159a.1	35549	30213	34719	2693	1148	9	26	31	151	5392	2433	7146	1861	2146	2181	20531	20843	20096	33344	2445	3021
osa-miR439a	0	0	0	0	0	0	0	0	0	0	0	0	0	0	0	0	0	0	0	0	0
osa-miR1436	1	1	0	0	0	0	0	0	0	0	0	0	0	0	0	0	0	0	0	0	0
osa-miR1847.1	1	1	0	0	0	0	0	0	0	0	0	0	0	0	0	0	0	0	0	0	0
osa-miR1847.2	0	0	0	0	0	0	0	0	0	0	0	0	0	0	0	0	0	0	0	0	0
osa-miR814a	0	0	0	0	0	0	0	0	0	0	0	0	0	0	0	0	0	0	1	0	0
osa-miR5146	0	0	1	0	0	0	0	0	0	0	0	0	0	0	0	0	0	0	0	0	0
osa-miR156a	1944	1532	1842	85	34	27	23	35	37	37	36	22	6	5	7	70	63	114	1620	30	37
osa-miR5815	0	0	0	0	0	0	0	0	0	0	0	0	0	0	0	0	0	0	2	0	0
osa-miR5144-3p	30	16	15	0	0	0	0	0	0	0	1	0	0	0	0	0	1	1	3	0	0
osa-miR5144-5p	1553	769	1117	10	9	0	0	0	0	21	17	70	3	8	7	105	62	112	509	8	7
osa-miR1428b	0	0	0	0	0	0	0	0	0	0	0	0	0	0	0	0	0	0	0	0	0
osa-miR2925	0	0	0	0	0	0	0	0	0	0	0	0	0	0	0	0	0	0	0	0	0
osa-miR1862a	480	360	423	91	31	14	2	24	11	0	0	1	2	2	8	7	10	21	337	19	34
osa-miR7692-5p	0	0	1	0	0	0	0	0	0	0	0	0	0	0	0	0	0	0	0	0	0
osa-miR7692-3p	6	0	2	1	0	0	0	0	0	0	0	0	0	0	0	0	0	0	0	0	0
osa-miR319a-3p.2-3p	4084	2207	3739	13	16	1	0	0	16	63	62	116	4	6	6	337	290	314	1313	9	18
osa-miR319a-3p	4794	4213	4465	2	25	0	0	0	0	14	18	17	0	0	0	5	9	74	2066	1	0
osa-miR319a-5p	345	130	238	0	0	0	0	0	0	0	0	0	0	0	0	0	0	0	29	0	0
osa-miR2870	16	1	6	0	0	0	0	0	0	0	0	0	0	2	1	3	2	0	8	0	4
osa-miR1435	0	0	0	0	0	0	0	0	0	0	0	0	0	0	0	0	0	0	0	0	0
osa-miR5819	0	0	1	0	0	0	0	0	0	0	0	0	0	0	0	0	0	0	0	0	0
osa-miR399e	1	0	0	0	0	0	0	0	0	0	0	0	0	0	0	0	0	2	0	0	0
osa-miR399a	0	0	0	0	0	0	0	0	0	0	0	0	0	0	0	0	0	0	0	0	0
osa-miR167j	1702	905	1345	24	14	0	1	7	21	47	21	58	2	5	6	104	116	98	1005	15	11
osa-miR812a	0	0	1	0	0	0	0	0	0	0	0	0	0	0	0	0	0	0	0	0	0
osa-miR11336-5p	8	5	4	1	0	0	2	1	2	0	1	0	0	1	0	0	0	0	0	0	0
osa-miR11336-3p	5	3	4	0	0	0	0	0	1	0	0	0	0	0	0	1	0	0	1	0	1
osa-miR5540	0	0	0	0	0	0	0	0	0	0	0	0	0	0	0	0	1	0	0	0	0
osa-miR2927	0	0	0	0	0	0	0	0	0	0	0	0	0	0	0	0	2	0	0	0	0
osa-miR2090	52	27	47	54	1	5	0	0	1	0	0	0	2	2	2	4	4	2	23	13	20
osa-miR1846d-5p	307	219	242	17	1	10	0	0	0	24	4	51	3	2	7	32	36	10	85	9	7
osa-miR1846d-3p	4	0	1	1	0	0	0	0	0	0	0	0	0	0	1	0	0	0	0	1	4
osa-miR818a	0	0	0	0	0	0	0	0	0	0	0	0	0	0	0	0	0	0	0	0	0
osa-miR5145	15	4	10	0	0	0	0	0	0	1	0	0	0	0	0	1	1	3	2	0	0
osa-miR5083	4	0	3	0	0	0	0	0	0	16	3	0	3	2	1	0	0	1	2	2	2
osa-miR2099-5p	0	0	0	0	0	0	0	0	0	0	0	0	0	0	0	0	0	0	0	0	0
osa-miR2099-3p	0	0	0	0	0	0	0	0	0	0	0	0	0	0	0	0	0	0	0	0	0
osa-miR172b	17	14	7	0	0	0	0	0	0	1	0	6	0	0	0	0	2	3	7	0	0
osa-miR5076	3	1	0	0	0	0	0	0	0	0	0	1	0	0	0	0	1	0	0	2	0
osa-miR168a-3p	5518	2363	3573	148	6	89	2	2	2	10	1	12	8	10	18	47	46	76	756	47	44
osa-miR168a-5p	5150	4258	4538	639	60	52	2	1	26	55	8	22	35	39	30	163	194	162	2345	174	221
osa-miR812b	0	1	0	0	0	0	0	0	0	0	0	0	0	0	0	0	0	0	0	0	0
osa-miR1428c	1	0	0	0	0	0	0	0	0	0	0	0	0	0	0	0	0	0	0	0	0
osa-miR397b	10	8	7	0	0	0	0	0	0	0	0	0	0	0	0	0	1	0	11	0	0
osa-miR160a-3p	0	0	0	0	0	0	0	0	0	0	0	0	0	0	0	0	0	0	0	0	0
osa-miR160a-5p	461	130	274	2	0	0	0	0	0	5	3	5	3	2	0	3	6	5	42	0	0
osa-miR167e-3p	72	25	32	0	0	0	0	0	0	0	0	1	0	0	0	0	0	1	20	0	0
osa-miR167e-5p	1084	535	856	2	7	0	0	1	3	1	3	8	0	0	0	0	6	19	517	0	1
osa-miR818b	0	0	0	0	0	0	0	0	0	0	0	0	0	0	0	0	0	0	0	0	0
osa-miR2863b	25	18	24	2	0	0	0	0	0	0	0	0	0	0	0	5	4	4	5	0	1
osa-miR156d	9313	7635	8640	182	96	58	54	114	131	87	53	82	26	23	16	226	227	399	7209	41	71
osa-miR5340	3	1	1	1	0	0	0	0	0	0	0	0	0	0	0	0	0	0	0	0	0
osa-miR2928	0	0	0	0	0	0	0	0	0	0	0	0	0	0	0	0	0	0	0	0	0
osa-miR399i	0	0	0	1	1	0	0	0	0	0	0	1	2	0	0	24	17	18	0	1	0
osa-miR399b	1	0	0	0	0	0	0	0	0	0	0	0	0	0	0	0	0	0	0	0	0
osa-miR399g	0	0	0	0	0	0	0	0	0	0	0	1	0	0	0	0	0	1	0	0	0
osa-miR5484	0	0	0	17	2	73	59	46	4	4	4	18	2	1	9	6	2	6	2	2	9
osa-miR1863a	123	43	87	3	1	0	0	0	0	1	0	0	0	0	0	1	1	0	6	3	1
osa-miR2122	0	0	0	0	0	0	0	0	0	0	0	0	0	0	0	0	0	0	0	0	0
osa-miR5541	0	0	0	0	0	0	0	0	0	0	0	0	0	0	0	0	0	0	0	0	0
osa-miR814c	1	0	1	0	0	0	0	0	0	0	0	0	0	0	0	0	0	0	1	0	0
osa-miR817	0	0	0	0	0	0	0	0	0	0	0	0	0	0	0	0	0	0	0	0	0
osa-miR5179	0	0	0	1	0	0	0	0	0	0	0	0	0	0	0	2	0	0	0	0	0
osa-miR1864	29	12	25	5	0	0	0	0	0	0	1	0	0	1	0	0	0	0	2	0	0
osa-miR529a	8110	6003	7236	27	24	1	1	0	30	71	88	29	7	18	17	635	614	860	1900	24	32
osa-miR6245	0	0	0	0	0	0	0	0	0	0	0	0	0	0	0	0	0	0	0	0	0
osa-miR5147	1	0	1	0	1	0	0	0	0	0	0	0	0	0	0	0	0	0	0	0	0
osa-miR437	0	0	0	0	0	0	0	0	0	0	0	0	0	0	0	0	0	0	0	0	0
osa-miR169f.1	0	0	0	0	0	0	0	0	0	0	0	0	0	0	0	0	0	0	0	0	0
osa-miR169f.2	1	3	0	0	0	0	0	0	0	0	0	0	0	0	0	2	2	0	0	0	0
osa-miR2879	45	23	24	0	0	0	0	0	0	0	0	0	0	0	0	0	0	0	0	0	0
osa-miR2873b	1	0	1	0	0	0	0	0	0	0	0	0	0	0	0	0	0	0	1	0	0
osa-miR5544	0	0	0	0	0	0	0	0	0	0	0	0	0	0	0	0	0	0	0	0	0
osa-miR5495	0	0	0	0	0	0	0	0	0	0	0	0	0	0	0	0	0	0	0	0	0
osa-miR1861b	0	0	1	0	0	0	0	0	0	0	0	0	0	0	0	0	0	0	0	0	0
osa-miR1861c	0	0	0	0	0	0	0	0	0	0	0	0	0	0	0	0	0	0	0	0	0
osa-miR5514	0	0	0	0	0	0	0	0	0	0	0	0	0	0	0	5	0	0	0	0	1
osa-miR5496	0	0	0	0	0	0	0	0	0	0	0	0	0	0	0	0	0	0	0	0	0
osa-miR5493	2	1	1	0	0	0	0	0	0	1	0	0	0	0	0	0	0	0	0	9	1
osa-miR162a	5697	3441	4486	44	26	63	40	63	112	53	34	53	4	9	6	196	185	206	1852	22	21
osa-miR2106	2	4	0	6	24	32	0	0	0	5	0	6	0	5	0	0	0	0	2	2	2
osa-miR156i	1999	1513	1797	91	38	20	15	50	48	23	22	32	7	16	7	75	70	115	1668	30	39
osa-miR166d-5p	472	354	478	40	9	24	66	4	44	5	2	3	12	5	15	316	252	186	277	25	15
osa-miR166d-3p	9057	6404	7772	228	78	81	56	84	76	433	181	482	45	54	77	1180	1203	914	3406	92	134
osa-miR814b	1	0	1	0	0	0	0	0	0	0	0	0	0	0	0	0	0	0	3	0	0
osa-miR394	657	163	410	1	3	0	0	0	0	7	6	28	3	0	0	16	12	16	69	0	2
osa-miR168b	0	0	0	0	0	0	0	0	0	0	0	0	0	0	0	0	0	0	0	0	0
osa-miR11337-5p	1	0	0	0	0	0	0	0	0	0	0	0	0	0	0	0	0	0	0	0	0
osa-miR11337-3p	0	0	0	0	0	0	0	0	0	0	0	0	0	0	0	0	0	0	0	0	0
osa-miR2094-5p	0	0	0	0	0	0	0	0	0	0	0	0	0	0	0	0	1	0	0	0	0
osa-miR2094-3p	3	0	0	1	0	0	0	0	0	0	0	0	0	0	5	3	3	1	0	1	0
osa-miR2863c	61	37	54	7	0	0	0	0	0	0	0	0	1	0	0	0	0	0	23	1	1
osa-miR169e	0	0	0	0	0	0	0	0	0	0	0	0	0	0	0	0	1	0	0	0	0
osa-miR166k-3p	4733	2612	4001	10	4	1	20	0	3	26	7	62	15	13	11	220	226	212	1199	7	15
osa-miR166k-5p	278	183	258	0	1	0	0	0	0	0	0	0	0	0	0	12	14	14	181	0	1
osa-miR166h-3p	6058	3820	5161	43	23	13	4	10	30	118	59	165	15	21	16	641	651	546	1783	31	37
osa-miR166h-5p	610	499	654	4	4	0	5	0	4	1	20	5	1	1	0	55	49	53	349	3	3
osa-miR396h	14	4	4	0	0	2	0	0	0	1	1	0	0	0	0	2	0	0	3	0	0
osa-miR164d	138	80	114	2	0	0	0	0	0	1	0	12	0	2	0	14	27	7	37	1	5
osa-miR396a-5p	204	71	137	34	3	2	20	16	2	11	12	18	1	1	10	21	9	27	28	10	16
osa-miR396a-3p	66	40	56	38	0	0	0	1	0	0	0	0	4	2	3	16	11	13	43	10	13
osa-miR396c-3p	1734	1421	1621	1	12	0	0	0	0	9	1	4	0	0	0	9	15	38	1081	0	1
osa-miR396c-5p	6490	3601	5320	31	30	42	44	11	5	269	450	258	10	8	67	167	170	215	2874	21	37
osa-miR11338-5p	0	1	1	0	0	0	0	0	0	0	0	0	0	0	0	0	0	0	0	0	0
osa-miR11338-3p	0	0	1	0	0	0	0	0	0	0	0	0	0	0	0	0	0	0	1	0	0
osa-miR172d-3p	68	22	39	0	1	0	0	0	0	0	0	0	0	0	0	0	0	1	24	0	1
osa-miR172d-5p	1005	513	690	0	2	0	0	0	0	0	0	0	0	0	0	0	0	4	118	0	0
osa-miR418	0	0	0	0	0	0	0	0	0	0	0	0	0	0	0	0	0	0	0	0	0
osa-miR396f-3p	14	5	4	0	0	0	0	0	0	0	0	0	0	0	0	0	0	0	0	0	0
osa-miR396f-5p	5016	2365	3458	46	26	35	2	29	10	62	37	85	6	13	21	223	203	396	1542	30	32
osa-miR818c	0	0	0	0	0	0	0	0	0	0	0	0	0	0	0	0	0	0	0	0	0
osa-miR6249a	2	0	0	0	0	0	0	0	0	0	0	1	0	0	0	0	0	0	1	0	0
osa-miR166e-5p	415	239	355	0	2	0	1	0	0	0	0	0	0	0	0	7	4	8	134	0	0
osa-miR166e-3p	143	109	160	1	3	4	2	5	2	10	9	8	0	1	1	9	16	6	56	0	1
osa-miR812h	1	1	1	0	0	0	0	0	0	0	0	0	0	0	0	0	0	0	0	0	0
osa-miR6256	0	0	0	0	0	0	0	0	0	1	0	0	0	0	0	0	0	0	0	0	0
osa-miR6246	7	4	4	1	0	0	0	0	0	0	0	4	0	1	0	1	4	0	3	0	0
osa-miR528-5p	1763	1700	1270	204	77	1	1	54	1	781	443	1635	142	182	204	2049	2012	1004	2771	163	211
osa-miR528-3p	248	176	203	0	0	0	0	0	0	22	30	43	3	0	0	5	3	8	84	0	1
osa-miR171e-5p	788	485	799	1	0	0	0	0	0	0	0	3	0	0	1	4	5	6	99	0	1
osa-miR171e-3p	41	28	35	0	0	0	0	0	0	0	0	0	0	0	0	1	0	3	16	0	0
osa-miR167g	1744	914	1299	33	21	1	1	3	21	39	18	76	5	5	9	99	111	117	1009	24	4
osa-miR166c-5p	28	9	7	0	0	0	0	0	1	3	0	0	0	0	0	6	3	5	1	0	0
osa-miR166c-3p	9273	6738	8030	185	68	84	71	90	50	408	171	492	47	58	56	1252	1215	990	3579	109	125
osa-miR812g	1	1	2	0	0	0	0	0	0	0	0	0	0	0	0	0	0	0	3	0	0
osa-miR812s	1	1	1	0	0	0	0	0	0	0	0	0	0	0	0	0	0	0	0	0	0
osa-miR1866-5p	1	0	0	0	0	0	0	0	0	0	0	0	0	0	0	0	0	0	0	0	0
osa-miR1866-3p	0	0	0	0	0	0	0	0	0	0	0	0	0	0	0	0	0	0	0	0	0
osa-miR2866	0	0	0	0	0	0	0	0	0	0	0	0	0	0	0	0	0	0	0	0	0
osa-miR5148a	0	0	1	0	0	0	0	0	0	0	0	0	0	0	0	0	0	0	1	0	0
osa-miR5531	0	0	0	0	0	0	0	0	0	1	0	0	0	0	0	0	0	0	0	0	0
osa-miR164e	42	22	32	1	0	0	0	0	0	0	0	1	0	0	1	0	0	3	7	0	0
osa-miR5811	12	2	2	0	0	0	0	0	0	0	0	0	0	0	0	0	2	0	0	0	0
osa-miR2905	0	2	0	0	0	0	0	0	0	0	0	0	0	0	0	0	0	0	0	0	0
osa-miR439d	0	0	0	0	0	0	0	0	0	0	0	0	0	0	0	0	0	0	0	0	0
osa-miR5077	1	0	2	1	0	0	0	0	0	0	1	0	0	0	0	0	0	0	0	0	0
osa-miR435	9	6	7	0	0	0	0	0	0	0	0	5	0	0	0	0	0	0	3	0	0
osa-miR1882a	0	0	0	0	0	0	0	0	0	0	0	0	0	0	0	0	0	0	0	0	0
osa-miR171i-5p	4	2	1	0	0	0	0	0	0	0	0	0	0	0	0	0	0	0	1	0	0
osa-miR171i-3p	32	22	33	0	0	0	0	0	0	0	0	0	0	0	0	0	0	0	12	0	0
osa-miR5485	0	0	0	71	5	49	18	6	41	6	10	7	4	5	8	4	3	10	8	20	15
osa-miR2880	3	2	5	9	0	0	0	0	0	0	0	0	0	0	1	0	0	0	0	3	5
osa-miR821a	0	0	0	0	0	0	0	0	0	0	0	0	0	0	0	0	0	0	0	0	0
osa-miR1428e-5p	9	1	1	0	0	0	0	0	0	0	0	0	0	0	0	0	0	0	2	0	0
osa-miR1428e-3p	387	123	200	0	1	0	0	0	0	0	0	0	0	0	0	1	4	10	32	0	0
osa-miR1428d	1	0	1	0	0	0	0	0	0	0	0	0	0	0	0	0	0	0	0	0	0
osa-miR1319b	0	0	0	0	0	0	0	0	0	0	0	0	0	0	0	0	0	0	0	0	0
osa-miR2907a	0	0	0	0	0	0	0	0	0	0	0	0	0	0	0	0	0	0	0	0	0
osa-miR166i-5p	13	0	4	0	0	0	0	0	0	0	0	0	0	0	0	0	0	1	15	0	0
osa-miR166i-3p	1785	1091	1455	3	7	2	2	0	41	21	3	13	0	0	1	44	37	77	599	0	5
osa-miR5486	0	0	0	0	0	0	0	0	0	0	0	0	0	0	0	2	0	0	0	0	0
osa-miR2863a	18	10	9	0	0	0	0	0	0	0	0	0	0	0	0	0	0	0	2	0	0
osa-miR5149	28	12	11	124	0	110	110	116	152	7	2	1	13	10	14	12	7	10	23	42	58
osa-miR5788	23	12	9	0	0	0	0	0	0	0	0	0	0	0	0	0	0	1	10	0	0
osa-miR443	0	1	0	0	0	0	0	0	0	0	0	0	0	0	0	0	0	0	0	0	0
osa-miR171f-5p	1	0	1	0	0	0	0	0	0	0	0	0	0	0	0	0	0	0	1	0	0
osa-miR171f-3p	49	29	26	0	0	0	0	0	0	1	0	0	1	0	0	1	0	5	10	0	1
osa-miR167b	516	216	347	6	18	21	2	0	2	26	24	57	2	4	8	85	73	85	219	2	7
osa-miR160d-5p	398	104	276	1	0	0	0	0	0	7	3	8	2	1	0	2	6	9	33	1	2
osa-miR160d-3p	0	0	0	0	0	0	0	0	0	0	0	0	0	0	0	0	0	0	0	0	0
osa-miR5497	0	0	0	0	0	0	0	0	0	0	0	0	0	1	0	0	2	0	0	0	0
osa-miR6248	5	4	2	0	0	0	0	0	0	4	0	0	0	0	0	0	1	0	3	0	0
osa-miR167c-5p	488	220	344	5	12	19	2	1	0	35	23	49	3	5	7	67	69	94	240	6	4
osa-miR167c-3p	2	2	2	0	0	0	0	0	0	0	0	0	0	0	0	0	0	0	0	0	0
osa-miR1865-5p	90	64	75	15	0	57	2	1	1	0	2	0	1	1	0	0	0	1	30	3	1
osa-miR1865-3p	47	12	21	4	1	1	51	1	1	0	0	0	0	0	0	0	0	0	12	0	1
osa-miR5513	4	7	5	0	0	0	0	0	0	0	0	0	0	0	0	0	0	1	6	0	0
osa-miR390-3p	727	365	543	1	0	0	0	0	0	4	0	2	0	0	0	0	2	1	41	0	0
osa-miR390-5p	2805	2053	2069	5	4	0	0	0	0	89	28	153	8	11	3	109	112	88	607	15	5
osa-miR169r-5p	5	3	0	0	0	0	0	0	0	1	1	0	0	0	0	0	0	0	4	0	0
osa-miR169r-3p	2	0	1	0	0	0	0	0	0	0	0	0	0	0	0	0	0	0	0	0	0
osa-miR5337b	1	1	0	0	0	0	0	0	0	0	0	0	0	0	0	0	0	0	0	0	0
osa-miR5533	0	0	0	0	0	0	0	0	0	0	0	0	0	0	0	0	0	0	0	0	0
osa-miR5337a	0	0	0	0	0	0	0	0	0	0	0	0	0	0	0	0	0	0	0	0	0
osa-miR1861d	0	1	3	0	0	0	0	0	0	0	0	0	0	0	0	3	1	0	4	0	0
osa-miR1861e	0	0	0	0	0	0	0	0	0	0	0	0	0	0	0	0	0	0	0	0	0
osa-miR530-3p	0	0	0	0	0	0	0	0	0	0	0	0	0	0	0	0	0	0	0	0	0
osa-miR530-5p	0	0	0	0	0	0	0	0	0	0	0	0	0	0	0	0	0	0	0	0	0
osa-miR2871b-5p	6	3	3	1	0	0	0	0	0	0	0	0	0	0	0	0	0	0	2	0	1
osa-miR2871b-3p	63	15	46	0	0	0	0	0	0	1	2	0	0	0	0	0	1	0	13	0	0
osa-miR5813	1	1	5	0	0	0	0	0	0	0	0	0	0	0	0	0	0	0	1	0	0
osa-miR5498	0	0	0	0	0	0	0	0	0	0	0	0	0	0	0	0	0	0	0	0	0
osa-miR5818	0	0	0	0	0	0	0	0	0	0	0	0	0	0	0	0	0	0	0	0	0
osa-miR812f	9	5	2	1	0	0	0	0	0	0	0	0	0	0	1	0	0	0	5	0	0
osa-miR5511	0	0	0	0	0	0	0	0	0	0	0	0	0	0	0	0	0	0	0	0	0
osa-miR529b	235	134	177	1	0	0	0	0	0	5	4	5	0	0	0	2	1	4	77	0	0
osa-miR5543	0	0	0	0	0	0	0	0	0	0	0	0	0	0	0	0	0	0	0	0	0
osa-miR2121b	3	1	0	0	0	2	0	0	0	0	0	0	0	0	0	0	0	0	2	0	0
osa-miR5499	0	0	0	0	0	0	0	0	0	0	0	0	0	0	0	0	1	0	0	1	0
osa-miR5515	0	0	0	0	0	0	0	0	0	0	0	0	0	0	0	1	0	0	0	0	0
osa-miR416	0	0	0	0	0	0	0	0	0	0	0	0	0	0	0	0	0	0	0	0	0
osa-miR5487	0	0	0	0	0	0	0	0	0	0	0	0	0	0	0	1	1	0	0	0	0
osa-miR1848	0	0	0	0	0	0	0	0	0	0	0	0	0	0	0	0	0	0	0	0	0
osa-miR5523	0	0	0	0	0	0	0	0	0	0	0	0	0	0	0	0	0	0	0	0	0
osa-miR5512b	6	0	0	0	0	0	0	0	0	0	0	0	0	0	0	0	0	0	0	0	0
osa-miR5512a	2	1	0	0	0	0	0	0	0	0	0	0	0	0	0	0	0	0	0	0	0
osa-miR5150-5p	128	58	119	1	0	0	0	0	1	0	0	0	0	0	0	0	0	0	30	3	1
osa-miR5150-3p	481	194	312	9	0	1	1	16	0	0	0	0	1	0	0	2	0	2	105	1	3
osa-miR169g	0	0	0	0	0	0	0	0	0	0	0	0	0	0	0	0	0	0	0	0	0
osa-miR1423-5p	796	544	691	152	6	1	1	28	1	3	1	2	3	3	10	10	9	5	263	36	37
osa-miR1423-3p	25	10	16	0	0	0	0	0	0	0	0	0	0	0	1	0	0	0	4	0	0
osa-miR1868	766	821	728	252	9	36	25	1	25	22	4	7	8	8	14	53	56	55	809	70	43
osa-miR1862g	0	0	0	0	0	0	0	0	0	0	0	0	0	0	0	0	0	0	0	0	0
osa-miR5804	0	0	0	0	0	0	0	0	0	0	0	0	0	0	0	0	0	0	0	0	0
osa-miR2118a	0	5	0	0	0	0	0	0	1	0	0	0	0	0	0	1	0	0	0	0	0
osa-miR1869	3	1	0	5	0	0	0	1	0	0	0	0	0	0	0	1	0	0	1	1	2
osa-miR2118b	0	0	0	4	0	0	0	0	0	14	18	16	7	1	4	22	31	11	0	6	3
osa-miR2118e	18	9	7	4	0	0	0	0	0	17	1	21	1	1	2	36	18	12	1	3	2
osa-miR2118d	0	0	0	1	0	0	0	2	1	1	1	0	0	0	0	1	3	0	0	0	0
osa-miR2118c	0	8	5	0	0	1	0	0	0	1	2	0	0	0	0	6	8	4	6	0	0
osa-miR5522	0	0	0	0	0	0	0	0	0	0	0	0	0	0	0	0	0	0	0	0	0
osa-miR2118g	16	31	17	56	42	63	4	65	4	0	2	0	1	7	1	3	3	2	23	27	18
osa-miR2118f	13	12	14	14	0	1	1	0	17	0	2	0	0	0	2	2	3	1	15	2	5
osa-miR2118i	0	0	1	0	2	2	0	3	0	0	0	0	1	0	0	0	0	0	0	0	2
osa-miR2118h	1	0	4	3	1	0	0	0	0	5	6	0	0	1	3	5	6	1	5	0	2
osa-miR2118j	9	13	6	14	0	1	0	2	28	2	4	3	3	1	1	2	2	2	12	9	5
osa-miR2118l	0	0	0	0	0	1	0	0	1	0	0	0	0	0	0	0	0	0	0	0	0
osa-miR2118k	1	2	1	7	0	1	0	0	0	6	4	2	0	0	1	7	3	5	5	0	0
osa-miR2118m	7	1	3	2	0	0	0	0	1	3	8	0	0	0	1	0	4	0	5	0	3
osa-miR2118o	6	5	5	4	1	0	0	0	0	14	11	29	3	0	0	32	33	26	2	4	0
osa-miR2118n	1	0	0	1	0	0	0	0	1	6	19	11	4	5	1	25	29	10	0	2	3
osa-miR1849	27	9	13	1	0	0	0	0	0	0	0	0	0	0	0	1	0	2	7	1	1
osa-miR5809	1	1	1	0	0	0	0	0	0	0	0	0	0	0	0	0	1	0	0	0	0
osa-miR5532	0	0	0	0	0	0	0	0	0	0	0	0	0	0	0	0	0	0	1	0	0
osa-miR162b	832	418	574	7	0	2	11	3	5	16	25	11	6	1	3	98	80	75	147	6	9
osa-miR156e	1921	1493	1812	106	31	19	20	39	48	44	27	38	5	13	8	78	88	125	1557	18	27
osa-miR5500	0	0	0	0	0	0	0	0	0	0	0	0	0	0	0	0	0	0	0	0	0
osa-miR171h	2	4	3	0	0	0	0	0	0	4	0	0	0	0	0	0	0	0	2	0	0
osa-miR2877	276	164	212	0	1	0	0	0	0	0	1	0	0	0	0	0	2	2	92	0	0
osa-miR5501	4	3	7	4	1	44	1	1	0	0	0	0	1	0	0	2	2	1	5	1	0
osa-miR399j	14	10	8	2	0	0	0	0	0	0	0	0	0	6	0	7	6	11	5	0	3
osa-miR5827	2	0	2	0	0	0	0	0	0	0	0	0	0	0	0	0	0	0	0	0	0
osa-miR5803	1	0	0	0	0	0	0	0	0	0	0	0	0	0	0	0	0	0	2	0	0
osa-miR6249b	0	0	0	0	0	0	0	0	0	0	0	0	0	0	0	0	0	0	0	0	0
osa-miR169c	2	1	1	0	0	0	0	0	0	0	0	0	0	0	0	0	0	0	0	0	0
osa-miR171c-3p	38	23	26	0	0	0	0	0	0	2	0	1	0	0	0	2	1	5	17	0	0
osa-miR171c-5p	365	210	313	0	0	0	0	0	0	0	0	0	0	0	1	6	9	6	64	0	0
osa-miR395g	59	58	60	0	1	0	0	0	0	0	0	0	0	0	0	2	0	3	62	0	0
osa-miR395f	14	5	9	0	0	0	0	0	0	0	0	0	0	0	0	0	0	0	2	0	0
osa-miR395e	80	57	65	0	0	0	0	0	0	0	0	0	0	0	0	1	4	7	51	0	0
osa-miR395d	67	65	53	0	1	0	0	0	0	0	0	0	0	0	0	2	3	1	42	0	0
osa-miR395c	8	5	9	0	0	0	0	0	0	0	0	0	0	0	0	0	0	0	1	0	0
osa-miR395b	79	56	60	0	1	0	0	0	0	0	0	0	0	0	0	2	2	3	46	0	0
osa-miR395a	27	21	17	0	0	0	0	0	0	0	0	1	0	0	0	2	1	1	13	0	0
osa-miR395m	65	57	46	1	1	0	0	0	0	0	0	0	0	0	0	1	0	2	30	0	0
osa-miR395n	56	63	62	0	0	0	0	0	0	0	0	0	0	0	0	0	1	1	54	0	0
osa-miR395o	6	3	3	0	0	0	0	0	0	0	0	0	0	0	0	0	0	0	2	0	0
osa-miR395p	51	44	59	1	1	0	0	0	0	0	0	1	0	0	0	2	2	6	48	0	0
osa-miR395q	56	44	59	0	1	0	0	0	0	0	0	0	0	0	0	1	0	0	35	0	0
osa-miR395s	66	50	51	1	0	0	0	0	0	0	0	0	0	0	0	1	1	0	40	1	1
osa-miR395x	0	0	0	0	0	0	0	0	0	0	0	0	0	0	0	0	0	0	0	0	0
osa-miR5542	1	2	3	0	0	0	0	0	0	0	0	0	0	0	0	0	0	1	2	1	0
osa-miR396e-5p	4969	2344	3308	56	30	22	2	14	9	40	31	84	6	12	15	233	222	374	1564	23	30
osa-miR396e-3p	91	41	71	1	2	0	0	0	0	0	0	0	0	0	0	0	0	0	32	0	1
osa-miR393b-3p	1459	549	941	0	3	0	2	0	1	1	2	4	0	0	0	7	11	10	372	0	0
osa-miR393b-5p	51	18	31	0	0	0	0	0	0	0	0	0	0	0	0	0	0	0	15	0	0
osa-miR818d	0	0	0	0	0	0	0	0	0	0	0	0	0	0	0	0	0	0	0	0	0
osa-miR426	0	0	0	0	0	0	0	0	0	0	0	0	0	0	0	0	0	0	0	0	0
osa-miR5153	7	1	1	0	0	0	0	0	0	0	0	0	0	0	0	0	0	0	1	0	0
osa-miR5151	43	13	32	6	0	0	0	0	0	0	0	0	0	0	1	0	2	0	6	2	2
osa-miR2871a-5p	81	45	41	0	1	0	0	0	0	0	0	0	0	0	0	0	2	2	31	0	0
osa-miR2871a-3p	61	20	54	0	0	0	1	0	0	2	0	2	0	0	0	2	1	2	9	1	3
osa-miR3981-5p	0	0	0	0	0	0	0	0	0	0	0	0	0	0	0	0	0	0	0	0	0
osa-miR3981-3p	0	0	0	0	0	0	0	0	0	0	0	0	0	0	0	0	0	0	0	0	0
osa-miR156l-5p	209	138	180	3	0	0	1	0	1	4	2	1	0	0	0	2	2	4	119	1	1
osa-miR156l-3p	195	125	167	0	2	0	0	1	0	0	1	0	0	0	0	0	0	2	166	0	0
osa-miR1425-5p	275	103	204	0	1	0	0	0	0	2	0	1	0	0	1	0	7	0	60	1	0
osa-miR1425-3p	212	113	150	0	1	0	0	0	0	15	1	0	0	0	1	8	6	15	59	0	1
osa-miR5833	1	1	0	0	0	0	0	0	0	0	0	0	0	0	0	0	0	0	0	0	0
osa-miR2919	0	0	0	0	0	0	0	0	0	0	0	0	0	0	0	0	0	0	0	0	0
osa-miR5516b	0	0	0	0	0	0	0	0	0	0	0	0	0	0	0	0	0	0	0	0	0
osa-miR5516a	0	0	0	0	0	0	0	0	0	0	0	0	0	0	0	0	0	0	0	0	0
osa-miR815b	0	0	0	0	0	0	0	0	0	0	0	0	0	0	0	0	1	0	0	0	0
osa-miR5338	0	0	0	0	0	0	0	0	0	0	0	0	0	0	0	0	0	0	0	0	0
osa-miR164b	2227	1512	1884	4	26	0	1	11	0	11	4	12	2	7	9	38	52	66	1075	7	6
osa-miR2093-3p	0	0	0	0	0	0	0	0	0	0	0	0	0	0	0	0	0	0	0	0	0
osa-miR2093-5p	0	0	0	0	0	0	0	0	0	0	0	0	0	0	0	0	0	2	0	0	0
osa-miR164c	94	52	91	2	1	0	0	0	0	4	0	0	0	2	4	56	56	64	32	0	3
osa-miR2102-5p	0	0	0	0	0	0	0	0	0	0	0	0	0	0	0	0	0	0	0	0	0
osa-miR2102-3p	0	0	0	0	0	0	0	0	0	0	0	0	0	0	0	0	0	0	0	0	0
osa-miR812v	3	4	0	1	0	0	0	0	0	0	0	1	0	0	0	0	2	0	0	0	1
osa-miR1861f	0	1	1	0	0	0	0	0	0	0	0	0	0	0	0	0	0	0	1	0	0
osa-miR1861g	0	0	1	0	0	0	0	0	0	0	0	0	0	0	0	0	0	0	0	0	0
osa-miR1852	0	1	0	0	0	0	0	0	0	0	0	0	0	0	0	0	1	0	0	0	0
osa-miR5078	0	0	0	0	0	0	0	0	0	0	0	0	0	0	0	0	0	0	0	0	0
osa-miR164f	2231	1537	1901	5	30	0	0	12	0	7	10	10	1	6	3	46	52	69	1083	16	7
osa-miR5825	1	0	0	1	0	0	0	0	0	0	0	0	0	0	0	6	1	5	0	0	1
osa-miR1851	6	1	0	1	0	0	1	26	2	0	0	1	0	0	0	2	1	0	0	1	0
osa-miR1850.3	0	0	0	0	0	0	0	0	0	0	0	0	0	0	0	0	0	0	0	0	0
osa-miR1850.2	0	0	0	0	0	0	0	0	0	0	0	0	0	0	0	0	0	0	0	0	0
osa-miR1850.1	636	531	607	304	85	191	284	84	153	9	2	1	24	21	23	46	56	25	324	127	163
osa-miR399c	0	0	0	0	0	0	0	0	0	0	0	0	0	0	0	0	0	0	0	0	0
osa-miR399h	0	0	0	0	0	0	0	0	0	0	0	0	0	0	0	0	0	0	0	0	0
osa-miR399k	0	0	0	0	0	0	0	0	0	0	0	0	0	0	0	0	0	0	0	0	0
osa-miR2869	0	0	0	0	0	0	0	0	0	0	0	0	0	0	0	0	0	0	0	0	0
osa-miR5831	2	0	2	0	0	0	0	0	0	0	0	0	0	0	0	0	0	0	0	0	0
osa-miR5152-3p	1	4	3	0	0	0	0	0	0	0	0	0	0	0	0	0	0	0	0	0	0
osa-miR5152-5p	0	0	0	0	0	0	0	0	0	0	0	0	0	0	0	0	0	0	0	0	0
osa-miR5502	0	0	0	0	0	0	0	0	0	0	0	0	0	0	0	0	0	0	0	0	0
osa-miR815a	0	0	0	0	0	0	0	0	0	0	0	0	0	0	0	0	0	0	0	0	0
osa-miR5508	17	14	19	1	0	0	0	0	0	0	0	0	0	0	0	0	0	1	17	1	0
osa-miR439h	0	0	0	0	0	0	0	0	0	0	0	0	0	0	0	1	0	0	0	0	0
osa-miR399d	44	24	43	2	0	0	0	0	0	0	0	4	0	0	0	14	14	4	4	1	2
osa-miR5789	0	0	0	0	0	0	0	0	0	0	0	0	0	0	0	0	0	0	0	0	0
osa-miR2931	0	0	0	0	0	0	0	0	0	0	0	0	0	0	0	0	0	0	0	0	0
osa-miR396b-5p	195	76	110	34	5	3	24	20	0	10	15	15	0	2	5	13	11	22	33	15	15
osa-miR396b-3p	71	36	57	47	1	0	0	0	0	1	0	1	3	10	4	7	14	14	48	8	18
osa-miR5834	0	0	0	0	0	0	0	0	0	0	0	0	0	0	0	0	0	0	0	0	0
osa-miR1872	19	2	12	0	0	0	0	0	0	0	0	0	0	0	0	4	1	2	0	0	0
osa-miR1320-3p	3	0	5	0	0	0	0	0	0	0	0	0	0	0	0	0	0	2	0	0	0
osa-miR1320-5p	34	8	7	3	0	0	0	0	0	1	1	0	0	0	3	35	33	26	5	2	3
osa-miR5154	5	3	6	0	0	0	0	0	0	0	0	0	0	0	0	0	0	0	1	0	0
osa-miR396g	10	5	5	0	0	0	0	0	0	0	1	0	0	0	0	1	2	0	1	0	0
osa-miR11340-5p	1	0	1	0	0	0	0	0	0	0	0	0	0	0	0	0	0	0	0	0	1
osa-miR11340-3p	2	0	0	0	0	0	0	0	0	0	0	0	0	0	0	0	0	0	0	0	0
osa-miR2930	0	0	0	0	0	0	0	0	0	0	0	0	0	0	0	0	0	0	0	0	0
osa-miR5799	0	0	0	0	0	0	0	0	0	0	0	0	0	0	0	0	0	0	0	0	0
osa-miR2926	0	0	0	0	0	0	0	0	0	0	0	0	0	0	0	0	0	0	0	0	0
osa-miR1871	1633	953	1314	708	174	370	473	756	428	18	3	14	30	31	44	57	50	60	574	225	216
osa-miR1861i	0	0	0	0	0	0	0	0	0	1	0	0	0	0	0	0	0	0	0	0	1
osa-miR5828	0	0	0	0	0	0	0	0	0	0	0	0	0	0	0	0	0	0	0	0	0
osa-miR5492	0	0	0	0	0	0	0	0	0	0	0	0	0	0	0	0	0	0	0	0	0
osa-miR2876-3p	23	7	23	0	0	1	1	1	0	0	0	0	1	0	0	0	0	0	7	0	0
osa-miR2876-5p	9	5	3	4	0	0	0	0	0	0	0	0	0	0	0	0	0	0	1	0	0
osa-miR812t	10	11	16	2	0	0	0	0	3	0	0	0	0	0	0	0	1	1	7	0	0
osa-miR5072	0	0	0	0	0	0	0	0	0	0	0	0	0	0	0	0	0	0	0	0	0
osa-miR5836	0	0	0	0	1	0	0	0	0	0	0	0	0	0	0	1	0	0	0	0	0
osa-miR5835	0	0	0	0	0	0	0	0	0	0	0	0	0	0	0	0	0	0	0	0	0
osa-miR5829	0	0	0	0	0	0	0	0	0	0	0	0	0	0	0	0	0	0	0	0	0
osa-miR438	0	0	0	0	0	0	0	0	0	0	0	0	0	0	0	0	0	0	0	0	0
osa-miR399f	1	0	0	0	0	0	0	0	0	0	0	0	0	0	0	0	0	3	0	0	0
osa-miR1870-5p	292	122	209	12	0	47	1	1	0	0	0	1	0	1	1	3	1	6	89	10	5
osa-miR1870-3p	94	37	73	0	0	0	0	0	0	0	0	0	0	0	0	1	2	0	33	0	0
osa-miR5517	0	0	0	0	0	0	0	0	0	0	0	0	0	0	0	0	0	0	0	0	0
osa-miR5806	0	0	0	0	0	0	0	0	0	0	0	0	0	0	0	0	2	0	0	0	0
osa-miR171a	1	0	1	0	0	0	0	0	0	0	0	0	0	0	0	0	0	0	0	0	0
osa-miR812c	1	0	1	0	0	0	0	0	0	0	0	0	0	0	0	0	0	0	0	0	0
osa-miR156j-5p	9291	7430	8767	167	113	67	52	119	118	94	60	93	13	19	15	230	227	407	7046	61	69
osa-miR156j-3p	8001	6148	6542	134	20	53	3	44	40	178	139	215	17	27	18	440	416	296	3605	47	67
osa-miR5814	141	81	128	32	2	3	26	74	41	0	0	0	3	0	0	0	4	2	37	12	16
osa-miR1861h	45	48	43	0	0	0	0	0	0	0	0	0	0	0	0	2	2	0	18	0	0
osa-miR169b	3	0	2	0	0	0	0	0	0	0	0	0	0	0	0	0	0	0	0	0	0
osa-miR5148b	0	0	0	0	0	0	0	0	0	0	0	0	0	0	0	0	0	0	0	0	0
osa-miR167i-5p	1093	546	830	0	3	0	1	0	0	6	1	9	0	0	2	0	6	22	481	0	0
osa-miR167i-3p	54	24	40	0	0	0	0	0	0	0	0	0	0	0	0	0	0	0	20	0	0
osa-miR160b-5p	456	131	262	1	0	0	0	0	1	7	6	5	3	2	0	4	6	6	37	2	0
osa-miR160b-3p	0	0	0	0	0	0	0	0	0	0	0	0	0	0	0	0	0	0	0	0	0
osa-miR5079a	0	0	0	0	0	0	0	0	0	0	0	0	0	0	0	0	0	0	1	0	0
osa-miR6250	0	0	0	0	0	5	0	0	0	2	0	3	0	0	0	0	3	1	0	0	1
osa-miR397a	21	12	17	0	0	0	0	0	0	0	0	0	0	0	0	0	1	3	17	0	0
osa-miR5339	0	0	0	0	0	0	0	0	0	0	0	0	0	0	0	0	0	0	0	0	0
osa-miR166b-3p	9146	6428	7849	223	72	72	43	83	66	419	217	511	49	71	63	1207	1193	987	3331	82	117
osa-miR166b-5p	404	420	388	3	2	0	1	0	0	4	0	4	0	1	3	77	67	51	261	2	1
osa-miR2918	0	0	0	0	0	0	0	0	0	0	0	0	0	0	0	0	0	0	0	0	0
osa-miR5081	0	0	0	0	0	0	0	0	0	0	0	0	0	0	0	0	0	0	0	0	0
osa-miR160e-3p	1	0	0	0	0	0	0	0	0	0	0	0	0	0	0	0	0	0	0	0	0
osa-miR160e-5p	1119	340	685	4	0	0	0	0	1	26	16	23	2	7	0	33	23	10	103	2	5
osa-miR167d-3p	29	9	20	0	0	0	0	0	0	0	0	0	0	0	0	0	0	0	4	0	0
osa-miR167d-5p	1725	863	1372	27	11	2	0	5	19	42	17	85	3	10	10	107	117	90	1089	16	16
osa-miR815c	0	0	0	0	0	0	0	0	0	0	0	0	0	0	0	0	0	0	0	0	0
osa-miR1428f-5p	10	7	7	0	0	0	0	0	0	0	0	0	0	0	0	0	0	0	1	0	0
osa-miR5798	0	0	0	0	0	0	0	0	0	0	0	0	0	0	0	2	0	0	0	0	0
osa-miR439c	0	1	0	0	0	0	0	0	0	0	0	0	0	0	0	1	0	0	0	0	0
osa-miR1882c	0	0	0	0	0	0	0	0	0	0	0	1	0	0	0	0	0	0	0	0	0
osa-miR5518	0	0	0	0	0	0	0	0	0	0	0	0	0	0	0	0	0	0	0	0	0
osa-miR1873	432	323	377	10	1	0	0	0	0	0	0	0	0	0	2	8	17	12	186	2	1
osa-miR172c	1	1	1	0	0	0	0	0	0	0	0	0	0	0	0	0	0	0	0	0	1
osa-miR820b	905	633	710	47	2	0	1	20	19	2	0	9	1	4	2	20	22	15	284	11	11
osa-miR398b	4	0	3	0	0	0	0	0	0	2	0	0	0	0	0	1	0	0	3	0	1
osa-miR171g	0	0	0	0	0	0	0	0	0	0	0	0	0	0	0	0	0	0	0	0	0
osa-miR821b	0	0	0	0	0	0	0	0	0	0	0	0	0	0	0	0	0	0	0	0	0
osa-miR2275c	0	0	1	0	0	0	0	0	0	0	0	0	0	0	0	0	0	0	0	0	0
osa-miR6247	0	0	0	0	0	0	0	0	0	0	0	0	0	0	0	0	0	0	0	0	0
osa-miR812i	1	1	1	0	0	0	0	0	0	0	0	0	0	0	0	0	0	0	0	0	0
osa-miR812d	2	1	0	0	0	0	0	0	0	0	0	0	0	0	0	0	0	0	0	0	0
osa-miR1432-3p	17	14	11	0	0	0	0	0	0	0	0	0	0	0	0	0	0	0	0	0	0
osa-miR1432-5p	4052	2233	3355	0	7	0	0	0	0	0	0	0	0	0	0	0	3	25	682	0	0
osa-miR6255	0	0	0	0	1	0	0	0	0	0	0	0	0	0	0	0	0	2	5	0	0
osa-miR6253	2	0	0	0	0	1	50	2	1	0	0	0	0	0	0	2	2	0	0	0	0
osa-miR1424	0	0	0	0	0	0	0	0	0	0	0	0	0	0	0	0	0	0	0	0	0
osa-miR2873c	0	0	0	0	0	0	0	0	0	0	0	0	0	0	0	0	0	0	0	0	0
osa-miR1442	0	0	0	0	0	0	0	0	0	0	0	0	0	0	0	0	0	0	0	0	0
osa-miR818e	0	0	0	0	0	0	0	0	0	0	0	0	0	0	0	0	0	0	0	0	0
osa-miR2920	0	0	0	0	0	0	0	0	0	0	0	0	0	0	0	0	0	0	0	0	0
osa-miR164a	2266	1644	1904	3	24	0	0	9	0	9	6	12	1	4	4	45	41	70	1085	8	4
osa-miR2275b	0	0	0	0	0	0	0	0	0	0	0	0	0	0	0	0	0	0	0	0	0
osa-miR2275a	0	0	0	0	0	0	0	0	0	0	0	0	0	0	0	0	0	0	0	0	0
osa-miR531a	0	0	0	0	0	0	0	0	0	0	0	0	0	0	0	0	0	0	0	0	0
osa-miR160c-5p	432	114	253	1	0	0	0	0	0	9	6	5	2	0	1	5	4	3	39	2	0
osa-miR160c-3p	79	54	76	0	0	0	0	0	0	0	0	0	0	0	0	0	0	0	10	0	0
osa-miR1429-3p	21	15	20	0	0	0	0	0	0	13	0	1	0	0	0	0	1	1	7	0	0
osa-miR1429-5p	6	3	5	0	0	0	0	0	0	0	0	0	0	0	0	0	0	3	4	0	0
osa-miR5796	0	0	0	0	0	0	0	0	0	0	0	0	0	0	0	0	0	0	0	0	0
osa-miR395h	63	51	47	0	1	0	0	0	0	0	0	1	0	1	0	0	1	1	30	0	0
osa-miR395i	69	53	58	0	0	0	0	0	0	0	0	0	0	0	0	2	5	1	31	0	0
osa-miR395j	59	45	61	0	1	0	0	0	0	0	1	0	0	0	0	2	1	2	49	0	0
osa-miR395k	66	55	56	1	0	0	0	0	0	0	1	0	0	0	0	0	3	0	56	0	0
osa-miR395y	57	53	55	0	0	0	0	0	0	0	0	1	0	2	0	1	2	2	44	0	0
osa-miR395l	72	49	64	0	1	0	0	0	0	0	0	0	0	1	0	1	4	5	37	0	1
osa-miR5807	18	15	14	41	0	37	1	1	1	0	0	0	4	0	3	4	4	0	5	10	15
osa-miR439g	0	0	0	0	0	0	0	0	0	0	0	0	0	0	0	0	0	1	0	0	0
osa-miR1853-3p	0	0	0	0	0	0	0	0	0	0	0	0	0	0	0	0	0	0	0	0	0
osa-miR1853-5p	0	0	0	0	0	0	0	0	0	0	0	0	0	0	0	0	0	0	0	0	0
osa-miR2275d	0	0	0	0	5	0	0	0	0	10	10	7	0	0	0	0	0	4	5	0	0
osa-miR1437b-3p	6	3	3	0	0	0	0	0	0	0	0	0	0	0	0	2	0	3	1	0	0
osa-miR1437a	0	0	0	0	0	0	0	0	0	0	0	0	0	0	0	0	0	0	0	0	0
osa-miR1437b-5p	26	8	18	0	0	0	0	0	0	6	0	2	0	0	0	0	3	0	5	0	0
osa-miR5071	0	0	0	0	0	0	0	0	0	0	0	0	0	0	0	0	0	0	0	0	0
osa-miR171b	37	18	36	0	0	0	0	0	0	2	0	1	0	0	0	1	1	0	14	0	0
osa-miR169p	0	0	1	0	0	0	0	0	0	0	0	0	0	0	0	0	0	0	0	0	0
osa-miR1854-3p	0	0	0	1	0	0	0	0	0	0	0	0	0	0	0	0	0	0	0	0	0
osa-miR1854-5p	0	0	0	0	0	0	0	0	0	0	0	0	0	0	0	0	0	0	0	0	0
osa-miR1862b	566	411	484	71	29	10	2	18	8	0	0	0	0	10	4	17	11	22	366	32	26
osa-miR1874-3p	19	10	16	275	33	193	86	183	100	14	5	28	5	21	8	18	20	9	14	44	82
osa-miR1874-5p	1	0	0	31	0	0	0	0	0	6	0	1	2	0	1	2	3	0	0	0	6
osa-miR5155	5	0	3	0	0	0	0	0	0	0	0	0	0	0	0	0	0	0	0	0	0
osa-miR1427	0	0	0	0	0	0	0	0	0	0	0	0	0	0	0	0	0	0	0	0	0
osa-miR5503	0	1	0	0	0	0	0	0	0	0	0	0	0	0	0	0	0	0	0	0	0
osa-miR812n-3p	18	3	10	2	0	0	0	1	2	0	0	0	0	0	1	0	0	0	8	2	1
osa-miR812n-5p	12	9	6	1	0	0	1	1	0	1	0	0	0	0	0	1	0	0	5	0	0
osa-miR417	0	0	0	0	0	0	0	0	0	0	0	0	0	0	0	0	0	0	0	0	0
osa-miR439e	1	0	0	0	0	0	0	0	0	0	0	0	0	0	0	0	0	0	0	0	0
osa-miR1861k	0	0	0	0	0	0	0	0	0	0	0	0	0	0	0	0	0	0	1	0	0
osa-miR1861j	56	36	35	0	0	0	0	0	0	0	0	0	0	0	0	10	3	0	19	1	0
osa-miR2874	16	3	8	0	0	0	0	0	0	0	0	0	0	0	0	0	0	0	0	0	0
osa-miR812e	0	0	3	0	0	0	0	0	0	0	0	0	0	0	0	0	0	1	0	0	0
osa-miR5156	22	7	18	1	0	0	0	0	0	0	0	0	0	1	0	0	0	0	6	0	0
osa-miR5797	0	0	0	1	0	0	0	0	0	0	0	1	1	0	0	5	7	1	0	1	3
osa-miR1882d	0	0	0	0	0	0	0	0	0	0	0	0	0	0	0	0	0	0	0	0	0
osa-miR818f	0	0	0	0	0	0	0	0	0	0	0	0	0	0	0	0	0	0	0	0	0
osa-miR5073	0	0	0	0	0	0	0	0	0	0	0	0	0	0	0	0	0	0	0	0	0
osa-miR812j	1	2	0	0	0	0	0	0	0	0	0	0	0	0	0	0	0	0	0	0	0
osa-miR821c	0	0	0	0	0	0	0	0	0	0	0	0	0	0	0	0	0	0	0	0	0
osa-miR812m	3	4	4	0	0	0	0	0	0	0	0	0	0	0	0	1	0	0	2	0	0
osa-miR5801c-5p	0	0	0	0	0	0	0	0	0	0	0	0	0	0	0	0	0	0	0	0	0
osa-miR5801c-3p	0	0	0	0	0	0	0	0	0	0	0	0	0	0	0	0	0	0	0	0	0
osa-miR5157a-3p	240	74	178	0	1	0	0	0	0	0	1	0	0	0	0	0	0	1	27	0	0
osa-miR5157a-5p	11	8	9	0	0	0	0	0	0	0	0	0	0	0	0	0	0	0	4	0	0
osa-miR156f-5p	9472	7394	8608	154	108	67	43	119	113	86	73	84	22	21	16	208	209	420	6991	53	64
osa-miR156f-3p	225	143	193	0	0	0	0	0	0	0	0	1	0	0	0	0	0	3	155	0	0
osa-miR5157b-3p	215	78	160	0	0	0	0	0	0	0	0	0	0	0	0	0	0	0	28	0	0
osa-miR5157b-5p	12	6	4	0	0	0	0	0	0	0	0	0	0	0	0	0	0	0	5	0	0
osa-miR156h-5p	9119	7499	8618	193	106	65	64	102	122	100	64	98	16	13	19	221	216	403	7091	55	60
osa-miR156h-3p	242	142	187	1	1	0	0	0	0	1	1	0	0	0	0	0	0	4	171	0	0
osa-miR2120	1	0	0	0	0	0	0	2	0	0	0	0	0	0	0	0	0	0	0	0	0
osa-miR166m	1127	669	957	10	4	2	4	5	11	33	25	47	2	2	7	84	78	39	193	6	6
osa-miR5158	15	10	22	11	0	0	0	0	0	0	0	0	1	0	2	0	1	1	10	5	7
osa-miR160f-5p	1016	347	673	278	65	7	20	25	30	48	63	73	8	13	15	8	14	51	173	55	92
osa-miR160f-3p	26	23	21	84	0	3	102	33	3	0	0	0	1	4	4	3	2	0	5	33	25
osa-miR812p	3	5	4	1	0	0	0	4	1	0	0	0	0	0	0	1	1	0	0	0	0
osa-miR2878-5p	296	189	198	4	17	0	1	48	3	0	0	0	0	1	0	3	2	2	112	1	0
osa-miR2878-3p	50	8	11	0	0	0	0	0	0	0	0	0	0	0	0	0	0	0	8	0	0
osa-miR169i-5p.2	84	47	87	0	0	0	0	0	0	0	0	0	0	0	0	3	1	0	12	0	0
osa-miR169i-5p.1	1	0	0	0	0	0	0	0	0	0	0	0	0	0	0	0	0	0	0	0	0
osa-miR169i-3p	12	6	3	0	0	0	0	0	0	0	0	0	0	0	0	0	0	0	1	0	0
osa-miR169h	1	0	0	0	0	0	0	0	0	0	0	0	0	0	0	0	0	0	0	0	0
osa-miR169m	0	0	0	0	0	0	0	0	0	0	0	0	0	0	0	0	0	0	0	0	0
osa-miR169l	2	0	0	0	0	0	0	0	0	0	0	0	0	0	0	0	0	0	0	0	0
osa-miR169q	0	0	0	0	0	0	0	0	0	0	0	0	0	0	0	0	0	0	0	0	0
osa-miR2875	0	0	0	0	0	0	0	0	0	0	0	0	0	0	0	0	0	0	0	0	0
osa-miR2055	44	45	39	1	0	0	0	0	0	4	1	4	0	0	1	11	4	1	10	1	1
osa-miR5524	0	0	0	0	0	0	0	0	0	0	0	0	0	0	0	0	0	0	0	0	0
osa-miR5525	1	0	0	7	3	0	0	0	0	0	0	0	0	0	0	1	0	0	1	3	3
osa-miR1440b	0	1	1	0	0	0	0	0	0	0	0	0	0	0	0	0	0	0	0	0	0
osa-miR1440a	0	0	0	0	0	0	0	0	0	0	0	0	0	0	0	0	0	0	0	0	0
osa-miR395w	0	0	0	0	0	0	0	0	0	0	0	0	0	0	0	0	0	0	0	0	0
osa-miR395v	1	0	0	0	0	0	0	0	0	0	0	0	0	0	0	0	0	0	0	0	0
osa-miR395u	1	0	1	0	0	0	0	0	0	0	0	0	0	0	0	0	0	0	0	0	0
osa-miR395t	3	1	0	0	0	0	0	0	0	0	0	0	0	0	0	0	0	0	4	0	0
osa-miR5491	0	0	0	0	0	0	0	0	0	0	0	0	0	0	0	0	1	0	0	0	0
osa-miR2865	3	3	0	0	0	0	0	0	0	0	0	0	0	0	0	0	1	3	8	0	0
osa-miR5536	4	1	3	0	0	0	0	0	0	0	0	0	0	0	0	0	0	0	0	0	0
osa-miR5795	0	0	0	0	0	0	0	0	0	0	0	0	0	0	0	0	0	0	0	0	0
osa-miR5816	1	3	0	0	0	0	0	0	0	0	0	0	0	0	0	0	0	0	0	0	0
osa-miR1858b	0	0	0	0	0	0	0	0	0	0	0	0	0	0	0	0	0	0	0	0	0
osa-miR1846e	3	2	1	3	0	0	0	0	0	0	0	0	0	1	1	1	4	6	2	0	1
osa-miR1861l	0	0	0	0	0	0	0	0	0	0	0	0	0	0	0	0	1	0	1	0	0
osa-miR1861m	0	1	0	0	0	0	0	0	0	0	0	0	0	0	0	0	1	0	1	0	0
osa-miR1858a	0	0	0	0	0	0	0	0	0	0	0	0	0	0	0	0	0	0	0	0	0
osa-miR169d	0	0	0	0	0	0	0	0	0	0	0	0	0	0	0	0	0	0	2	0	0
osa-miR156g-5p	1999	1544	1897	86	29	22	15	45	37	41	35	42	9	9	11	64	72	104	1526	22	41
osa-miR156g-3p	362	227	274	3	1	7	0	0	1	1	1	0	0	0	1	0	0	14	269	0	0
osa-miR6251	4	0	1	0	0	0	0	0	0	0	0	0	0	0	0	0	0	0	2	0	0
osa-miR1878	951	496	702	8	4	1	3	57	36	0	0	6	0	0	0	3	5	9	287	1	0
osa-miR166l-5p	105	42	79	0	0	0	0	0	0	0	0	0	0	0	0	1	0	1	20	0	0
osa-miR166l-3p	4836	2708	4190	13	12	0	15	2	0	33	6	67	14	10	6	221	229	233	1185	14	16
osa-miR439f	0	0	0	0	0	0	0	0	0	0	0	0	0	0	0	0	0	0	0	0	0
osa-miR1875	35	23	32	10	1	0	0	0	0	7	0	0	0	0	1	1	7	3	9	2	1
osa-miR156k	14	7	7	0	0	1	0	3	1	0	0	1	0	0	0	0	0	0	17	0	0
osa-miR5801b	1	0	0	0	0	0	0	0	0	0	0	0	0	0	0	0	0	0	0	0	0
osa-miR169j	0	0	2	0	0	0	0	0	0	0	0	0	0	0	0	0	0	0	0	0	0
osa-miR169k	1	0	0	0	0	0	0	0	0	0	0	0	0	0	0	0	0	0	0	0	0
osa-miR1877	0	0	0	5	0	1	43	1	1	1	18	1	0	0	0	1	1	0	0	0	1
osa-miR172a	64	19	37	0	0	0	0	0	0	0	0	0	0	0	0	0	0	1	20	0	1
osa-miR11341-5p	1	0	0	0	0	0	0	0	0	0	0	0	0	0	0	0	0	0	0	0	0
osa-miR11341-3p	1	1	0	0	0	0	0	0	0	0	0	0	0	0	0	0	0	0	1	0	0
osa-miR1846a-5p	12	12	19	3	1	0	0	0	0	6	0	2	1	0	0	4	12	6	8	8	4
osa-miR1846a-3p	13	2	8	1	7	0	0	0	0	6	0	1	0	1	1	4	1	3	6	1	0
osa-miR5526	0	0	1	0	0	0	0	0	0	0	0	0	0	0	0	0	0	0	0	0	0
osa-miR2929	0	0	0	0	0	0	0	0	0	0	0	0	0	0	0	0	0	0	0	0	0
osa-miR5080	0	0	0	0	0	0	0	0	0	0	0	0	0	0	0	0	0	0	0	0	0
osa-miR1428g-5p	7	8	2	0	0	0	0	0	0	0	0	0	0	0	0	0	0	0	4	0	0
osa-miR1876	3717	2088	3850	1317	67	120	144	199	104	16	32	17	71	112	144	119	155	47	1468	789	880
osa-miR1862d	7755	4721	6057	310	112	88	89	279	136	20	23	36	20	15	18	53	65	93	2930	118	120
osa-miR439b	0	0	0	0	0	0	0	0	0	0	0	0	0	0	0	0	0	0	0	0	0
osa-miR1879	105	72	79	45	10	1	12	35	42	0	0	0	2	1	5	2	4	3	76	32	22
osa-miR2095-5p	0	0	0	0	0	0	0	0	0	0	0	0	0	3	1	0	1	4	0	0	0
osa-miR2095-3p	0	0	0	0	0	0	0	0	0	0	0	0	0	0	0	0	0	0	0	0	0
osa-miR820c	860	672	717	52	2	1	1	21	20	7	1	7	2	2	3	18	24	12	261	10	16
osa-miR1438	0	0	0	0	0	0	0	0	0	0	0	0	0	0	0	0	0	0	0	0	0
osa-miR398a	0	0	0	0	0	0	0	0	0	1	1	0	0	0	0	0	0	0	0	0	0
osa-miR1882e-3p	0	0	0	0	0	0	0	0	0	0	0	0	0	0	0	0	0	0	0	0	0
osa-miR1882e-5p	0	0	0	0	0	0	0	0	0	0	0	0	0	0	0	0	0	0	0	0	0
osa-miR2932	0	0	0	0	0	0	0	0	0	0	0	0	0	0	0	0	0	0	0	0	0
osa-miR5079b	0	0	0	0	0	0	0	0	0	0	0	0	0	0	0	0	0	0	1	0	0
osa-miR5537	0	0	1	0	0	0	0	0	0	0	0	0	0	0	0	0	0	0	2	0	0
osa-miR5792	0	0	1	71	2	4	36	106	39	2	1	0	2	4	3	5	2	2	0	20	16
osa-miR5820	0	0	0	0	0	0	0	0	0	0	0	0	0	0	0	1	0	0	0	0	0
osa-miR166f	9255	6426	7743	210	57	73	36	85	75	400	203	483	46	71	72	1242	1180	979	3446	109	136
osa-miR167f	1744	873	1353	23	16	1	3	8	20	35	23	101	4	4	9	103	126	98	962	17	14
osa-miR1862c	513	424	455	73	26	16	3	13	14	0	1	0	0	9	4	15	13	21	368	21	25
osa-miR5504	2	1	1	1	0	0	0	0	0	5	1	10	1	8	5	0	2	0	0	2	1
osa-miR2098-3p	0	0	0	0	0	0	0	0	0	0	0	0	0	0	0	0	0	0	0	0	0
osa-miR2098-5p	0	0	0	0	0	0	0	0	0	0	0	0	0	0	0	0	0	0	0	0	0
osa-miR812q	5	3	3	0	0	0	0	0	0	0	0	0	0	0	0	0	0	0	1	0	0
osa-miR7694-3p	50	25	28	0	0	0	0	0	0	0	0	0	0	0	0	0	0	1	24	0	0
osa-miR7694-5p	33	12	36	0	0	0	0	0	0	0	0	0	0	0	0	0	0	0	2	0	0
osa-miR166a-5p	433	257	324	0	1	0	1	0	0	0	0	0	0	0	0	6	5	13	129	0	0
osa-miR166a-3p	9266	6480	7793	222	66	74	56	73	83	384	214	517	36	63	66	1235	1178	907	3514	92	119
osa-miR11344-5p	4	2	2	0	0	0	0	0	0	0	0	0	0	0	0	0	0	0	1	0	0
osa-miR11344-3p	0	0	0	0	0	0	0	0	0	0	0	0	0	0	0	0	0	0	0	0	0
osa-miR171d-5p	618	416	596	0	2	0	0	0	0	0	0	0	0	0	0	0	0	2	122	0	0
osa-miR171d-3p	40	17	32	0	1	0	0	0	0	0	0	0	0	0	0	2	1	5	8	0	0
osa-miR5538	0	0	0	1	0	0	0	0	0	0	0	0	0	0	0	0	0	0	0	0	0
osa-miR816	0	0	0	0	0	0	0	0	0	0	0	0	0	0	0	0	0	0	0	0	0
osa-miR2922	0	0	0	0	0	0	0	0	0	0	0	0	0	0	0	0	0	0	0	0	0
osa-miR1319a	0	2	1	3	0	0	0	0	0	0	0	0	0	0	0	0	0	0	0	0	0
osa-miR810b.2	18	14	9	0	1	0	0	0	0	0	0	1	0	0	0	0	0	0	3	0	0
osa-miR810b.1	104	67	76	14	0	0	0	0	2	2	2	1	1	1	1	2	4	4	22	3	1
osa-miR5082	7	1	2	62	3	59	68	2	5	70	39	163	16	20	23	35	25	29	12	30	50
osa-miR3982-3p	0	0	3	0	0	0	0	0	0	0	0	0	0	0	0	0	0	0	0	0	0
osa-miR3982-5p	1	3	2	0	0	0	0	0	0	0	0	0	0	0	0	0	0	0	0	0	0
osa-miR1862e	2209	1073	1577	246	59	42	31	71	124	4	0	2	7	14	10	14	20	18	701	54	58
osa-miR2872	0	0	0	0	0	0	0	0	0	0	0	0	0	0	0	0	0	0	0	0	0
osa-miR1857-5p	14	5	6	1	0	0	0	0	0	0	0	0	0	0	0	1	0	0	2	0	0
osa-miR1857-3p	2	3	9	0	0	0	0	0	0	0	0	0	0	0	0	0	0	0	0	0	0
osa-miR5148c	0	0	0	0	0	0	0	0	0	0	0	0	0	0	0	0	0	0	0	0	0
osa-miR169o	0	0	0	0	0	0	0	0	0	0	0	0	0	0	0	0	0	0	0	0	0
osa-miR169n	0	0	0	0	0	0	0	0	0	0	0	0	0	0	0	0	0	0	0	0	0
osa-miR5534a	1	0	0	0	0	2	0	1	0	0	0	0	0	0	0	0	0	0	0	0	0
osa-miR5534b	0	0	0	0	0	0	0	0	0	0	0	0	0	0	0	0	0	0	0	0	0
osa-miR2907b	0	0	0	0	0	0	0	0	0	0	0	0	0	0	0	0	0	0	0	0	0
osa-miR5790	0	0	0	2	0	0	0	0	0	0	0	0	2	1	0	29	22	47	2	1	2
osa-miR2118p	0	2	0	0	0	0	0	0	0	0	2	8	0	0	0	2	0	3	0	0	0
osa-miR2118r	11	10	7	10	1	0	0	0	0	11	2	20	2	3	1	25	16	19	5	1	1
osa-miR2118q	4	6	2	1	0	0	0	0	0	1	0	3	0	0	0	5	7	5	0	0	2
osa-miR5075	0	0	0	0	0	0	0	0	0	0	0	0	0	0	0	0	0	0	0	0	0
osa-miR812u	17	10	13	1	0	0	0	0	0	0	0	0	0	0	0	0	1	0	9	0	1
osa-miR440	2	3	2	0	0	0	0	0	0	0	0	0	0	0	0	2	0	0	4	0	0
osa-miR1883b	97	77	67	30	7	13	1	0	0	1	0	0	3	3	2	3	1	1	22	12	13
osa-miR5528	0	0	0	0	0	0	0	0	0	0	0	0	0	0	0	0	0	0	0	0	0
osa-miR5527	0	0	0	0	0	0	0	0	0	0	0	0	0	0	0	0	0	0	0	0	0
osa-miR1856	19	12	29	0	0	0	0	0	0	0	0	0	0	0	0	0	2	0	11	0	0
osa-miR1882f	0	0	0	0	0	0	0	0	0	0	0	0	0	0	0	0	0	0	0	0	0
osa-miR2907c	0	0	0	0	0	0	0	0	0	0	0	0	0	0	0	0	0	0	0	0	0
osa-miR5159	187	122	137	91	25	21	1	46	1	1	0	1	2	12	10	13	6	5	64	66	70
osa-miR5826	1	0	2	0	0	0	0	0	0	0	0	0	0	0	0	0	0	0	0	0	0
osa-miR2104	0	0	0	0	0	0	0	0	0	0	0	0	0	0	0	0	0	0	0	0	0
osa-miR1883a	169	128	152	26	11	14	0	1	0	1	0	1	0	3	1	3	4	0	27	10	20
osa-miR1880	80	48	90	0	0	0	0	0	0	0	0	0	0	0	0	1	0	1	9	0	0
osa-miR414	0	0	0	0	0	0	0	0	0	0	0	0	0	0	0	0	0	0	0	0	0
osa-miR2100-3p	0	0	0	0	0	0	0	0	0	0	0	0	0	0	0	0	0	0	0	0	0
osa-miR2100-5p	0	0	1	0	0	0	0	0	0	0	0	0	0	0	0	0	0	0	0	0	0
osa-miR2867-5p	5	3	2	0	0	0	0	0	0	0	0	0	0	0	0	0	0	0	0	0	0
osa-miR2867-3p	6	2	9	5	0	0	0	0	0	0	0	0	0	0	0	0	2	0	2	2	1
osa-miR535-3p	83	61	90	1	2	0	0	0	0	4	2	2	2	0	0	23	26	25	41	0	0
osa-miR535-5p	1743	1404	1707	50	26	0	1	0	1	74	71	69	34	44	31	729	706	550	1195	37	52
osa-miR2868	2	1	3	0	0	0	0	0	0	0	0	0	0	0	0	0	0	0	1	0	0
osa-miR812r	7	0	4	0	0	0	0	0	0	0	0	0	0	0	0	0	0	0	2	0	0
osa-miR3979-5p	0	0	0	0	0	0	0	0	0	0	0	0	0	0	0	0	0	0	2	0	0
osa-miR3979-3p	0	0	0	0	0	0	0	0	0	0	0	0	0	0	0	0	0	0	1	0	0
osa-miR1882g	0	0	0	0	0	0	0	0	0	0	0	0	0	0	0	0	0	0	0	0	0
osa-miR5823	2	0	0	4	0	0	0	0	0	0	0	0	0	0	0	1	1	0	0	1	0
osa-miR2923	0	0	0	0	0	0	0	0	0	0	0	0	0	0	0	0	0	0	0	0	0
osa-miR1855	0	0	0	0	0	0	0	0	0	0	0	0	0	0	0	0	0	0	0	0	0
osa-miR2921	0	0	0	0	0	0	0	0	0	0	0	0	0	0	0	0	0	0	0	0	0
osa-miR5489	0	0	0	3	0	0	0	0	0	0	0	0	0	1	0	5	2	0	1	0	1
osa-miR11342-3p	0	2	0	0	0	0	0	0	0	0	0	0	0	0	0	0	0	0	0	0	0
osa-miR11342-5p	0	0	0	0	0	0	0	0	0	0	0	0	0	0	0	0	0	0	0	0	0
osa-miR5509	0	0	0	0	0	0	0	0	0	0	0	0	0	0	0	0	0	0	0	0	0
osa-miR5793	0	0	0	0	0	0	0	0	0	0	0	0	1	0	0	6	3	5	0	2	0
osa-miR5837.1	0	0	0	0	0	0	0	0	0	0	0	0	0	0	0	0	0	0	0	0	0
osa-miR5837.2	0	0	0	0	0	0	0	0	0	0	0	0	0	0	0	0	0	0	0	0	0
osa-miR5529	0	0	0	0	0	0	0	0	0	0	0	0	0	0	0	0	0	0	0	0	0
osa-miR5800	0	0	0	0	0	0	0	0	0	0	0	0	0	0	0	0	0	0	0	0	0
osa-miR5490	0	0	0	0	0	0	0	0	0	0	0	0	0	0	0	0	0	0	0	0	0
osa-miR5822	0	0	0	0	0	0	0	0	0	0	0	0	0	0	0	0	0	0	0	0	0
osa-miR531c	0	0	0	0	0	0	0	0	0	0	0	0	0	0	0	0	0	0	0	0	0
osa-miR1846b-3p	17	6	10	0	8	0	0	0	0	4	0	2	0	0	2	4	2	4	4	0	1
osa-miR1846b-5p	11	11	21	1	0	0	0	0	0	5	1	9	1	1	0	6	5	6	8	3	4
osa-miR2873a	27	20	22	0	0	0	0	0	0	0	0	0	0	0	0	0	0	2	25	0	0
osa-miR1846c-5p	11	12	14	1	0	0	0	0	0	2	0	1	0	0	0	3	6	2	8	3	1
osa-miR1846c-3p	0	0	0	0	0	0	0	0	0	0	0	0	0	0	0	0	0	0	0	0	0
osa-miR6254	1	0	0	0	0	0	0	0	0	0	0	0	0	0	0	0	0	0	2	0	0
osa-miR5160	3	1	6	0	0	0	0	0	0	0	0	0	0	0	0	0	1	0	2	0	0
osa-miR2105	0	0	0	0	0	0	0	0	0	0	0	0	0	0	0	0	0	0	0	0	0
osa-miR1863b	29	16	37	4	0	0	0	0	0	0	0	0	0	0	0	2	0	0	10	5	2
osa-miR1863b.2	289	169	226	37	1	15	15	37	4	0	0	0	0	2	3	4	2	1	86	14	6
osa-miR1863c	185	102	119	33	0	72	2	2	1	0	1	0	1	1	2	2	1	4	66	7	8
osa-miR1881	6	1	8	124	0	2	49	3	48	10	0	0	4	10	12	9	10	0	4	67	58
osa-miR1430	0	0	0	0	0	0	0	0	0	0	0	0	0	0	0	0	0	0	0	0	0
osa-miR5810	1	1	1	0	0	0	0	0	0	0	0	0	0	0	0	0	1	0	0	0	0
osa-miR419	0	0	0	1	0	0	0	0	0	0	0	0	0	0	0	0	0	0	0	0	0
osa-miR1439	1	1	1	0	0	0	0	0	0	0	0	0	0	0	0	0	0	0	0	0	0
osa-miR2092-5p	0	0	0	0	0	0	0	0	0	0	0	0	0	0	0	0	0	0	0	0	0
osa-miR2092-3p	0	0	0	0	0	0	0	0	0	0	0	0	0	0	0	0	0	0	0	0	0
osa-miR413	0	0	0	0	0	0	0	0	0	0	0	0	0	0	0	0	0	0	0	0	0
osa-miR5161	3	0	3	0	0	0	0	0	0	0	0	0	0	0	0	0	0	0	0	0	0
osa-miR2907d	0	0	0	0	0	0	0	0	0	0	0	0	0	0	0	0	0	0	0	0	0
osa-miR5535	0	0	0	0	0	0	0	0	0	0	0	0	0	0	0	0	0	0	0	0	0
osa-miR5074	0	0	0	0	0	0	0	0	0	0	0	0	0	0	0	0	0	0	0	0	0
osa-miR6245b-3p	0	0	0	0	0	0	0	0	0	0	0	0	0	0	0	0	0	0	0	0	0
osa-miR6245b-5p	0	0	0	0	0	0	0	0	0	0	0	0	0	0	0	0	0	0	0	0	0
osa-miR5505	0	0	0	1	0	0	0	0	0	0	0	0	0	0	0	0	0	0	0	0	0
osa-miR5805	63	50	57	20	0	0	0	0	0	0	0	0	0	1	0	3	1	1	19	5	8
osa-miR5506	0	0	0	0	0	0	0	0	0	0	0	0	0	0	0	3	1	0	0	0	0
osa-miR11343-3p	0	0	0	0	0	0	0	0	0	0	0	0	0	0	0	0	0	0	0	0	0
osa-miR11343-5p	0	0	0	0	0	0	0	0	0	0	0	0	0	0	0	0	0	0	0	0	0
osa-miR5162	6	3	4	0	0	0	0	0	0	0	0	0	0	0	0	0	0	0	0	0	1
osa-miR1861n	130	85	87	0	0	0	0	0	0	0	0	0	0	0	0	0	0	2	19	0	0
osa-miR2103	4	2	4	0	0	0	0	0	0	0	1	1	0	0	0	2	2	2	0	0	0
osa-miR2101-5p	0	0	0	0	0	0	0	0	0	0	0	0	0	0	0	0	0	0	0	0	0
osa-miR2101-3p	0	0	0	0	0	0	0	0	0	0	0	0	0	0	0	2	5	3	0	0	0
osa-miR5488	0	0	0	0	0	0	0	0	0	0	0	0	0	0	0	2	0	0	0	0	0
osa-miR6252	3	0	3	0	0	0	0	0	0	0	0	0	0	0	0	0	1	0	0	0	0
osa-miR166g-5p	8	5	3	0	0	0	0	0	0	0	0	0	0	0	0	0	0	0	7	0	0
osa-miR166g-3p	6488	3991	5473	39	21	19	4	4	33	103	71	154	9	23	17	702	631	577	1843	35	47
osa-miR5510	1	0	0	0	0	0	0	0	0	0	0	0	0	0	0	0	0	0	0	0	0
osa-miR5801a	0	0	0	0	0	0	0	0	0	0	0	0	0	0	0	0	0	0	0	0	0
osa-miR2091-3p	0	0	0	0	0	0	0	0	0	0	0	0	0	0	0	0	0	0	0	0	0
osa-miR2091-5p	0	0	0	0	0	0	0	0	0	0	0	0	0	0	0	0	0	0	0	0	0
osa-miR1441	0	0	0	0	0	0	0	0	0	0	0	0	0	0	0	0	0	0	0	0	0
osa-miR5539a	0	0	0	0	0	0	0	1	0	0	0	0	0	0	0	0	0	0	0	0	1
osa-miR5539b	0	0	0	0	0	0	0	3	0	0	0	0	0	0	0	0	0	0	0	0	0
osa-miR5507	0	0	0	0	0	0	0	0	0	0	0	0	0	1	0	0	3	0	0	0	0
osa-miR5832	0	0	0	0	0	0	0	0	0	0	0	0	0	0	0	0	0	0	0	0	0
osa-miR1882h	0	0	0	0	0	0	0	0	0	0	0	0	0	0	0	0	0	0	0	0	0
osa-miR5530	0	0	0	0	0	0	0	0	0	0	0	0	0	0	0	0	0	0	0	0	0
osa-miR5519	0	0	0	0	0	0	0	0	0	0	0	0	0	0	0	5	13	5	0	1	0
osa-miR5791	0	0	0	0	1	0	0	0	1	0	0	0	0	0	0	0	0	1	0	0	0
osa-miR5821	0	0	0	3	0	0	0	0	0	0	0	0	0	0	0	0	4	0	0	0	0
osa-miR167a-5p	481	231	365	6	8	14	0	1	0	44	24	52	5	3	6	71	64	83	220	5	6
osa-miR167a-3p	7	0	1	0	0	0	0	0	0	7	1	4	0	0	0	5	0	0	1	0	0
osa-miR167h-5p	1746	840	1336	29	15	0	0	9	23	44	20	62	4	5	6	102	120	109	982	10	8
osa-miR167h-3p	93	48	51	0	0	0	0	0	0	0	0	0	0	0	0	0	4	0	55	0	0
osa-miR2864.2	4	6	5	0	0	0	0	0	0	0	0	0	0	0	0	0	0	0	3	0	0
osa-miR2864.1	0	0	1	0	0	0	0	0	0	0	0	0	0	0	0	0	0	0	0	0	0
osa-miR7693-3p	25	13	9	0	0	0	0	0	0	0	0	0	0	0	0	0	0	0	3	0	0
osa-miR7693-5p	26	14	10	2	0	0	0	0	0	0	0	0	0	0	0	1	0	0	10	0	0
osa-miR415	0	0	0	0	0	0	0	0	0	0	0	0	0	0	0	0	0	0	0	0	0

## Sheet: README
miRNA reads were identified by comparing mapped positions with annotated miRNA coordinates (miRBase version 22) and requiring at least 90% of read length overlap.
Counts are not normalized to library sizes.
Top row indicates sample ID and corresponds to tissue types as follows:
sample_ID	sample_type
B15	seedling shoot
B20	seedling shoot
B25	seedling shoot
BS1	sperm
BS2	sperm
BS4a	sperm
BS4b	sperm
BS6a	sperm
BS6b	sperm
E2	egg
E3	egg
E4	egg
E9a	egg
E9b	egg
E9c	egg
OV1a	ovary
OV1b	ovary
OV2	ovary
SD4	seedling shoot
SP5b	sperm
SP5c	sperm
