# Supplementary material for: Genome-wide redistribution of 24-nt siRNAs in rice gametes
Source: HighWire-hosted journal article supplement (doi:10.1101/gr.253674.119), 2020-01-02
Supplement: Supplemental_Table_1.xlsx [file Supplemental_Table_1.xlsx]

## Sheet: mapped small RNA counts
Tissue	SRA/GEO accession	mapped 20-25nt reads (in millions)
sperm	SRX5757675	2.133
sperm	SRX5757674	0.39
sperm	SRX5757671	0.551
sperm	SRX5757670	0.57
sperm	SRX5757718	0.715
sperm	SRX5757719	0.637
sperm	SRX5757716	0.917
sperm	SRX5757717	1.032
7 day seedling	SRX5757712	7.527
7 day seedling	SRX5757713	4.547
7 day seedling	SRX5757695	6.065
7 day seedling	SRX5757721	2.804
egg	SRX5757720	0.255
egg	SRX5757723	0.318
egg	SRX5757657	0.358
egg	SRX5757656	1.105
egg	SRX5757655	0.498
egg	SRX5757669	1.019
ovary (egg removed)	SRX5757668	3.778
ovary (egg removed)	SRX5757691	3.654
ovary (egg removed)	SRX5757722	2.807
12 day seedling	SRX3513471	35
12 day seedling	SRX3513472	37.86
12 day seedling	SRX1760739	15.107
12 day seedling	SRX1760738	11.87
3-4 week root	SRX2934272	31.067
embryo, dry seed	SRX1298736	15.47
embryo, 12 hours imbibition	SRX1298737	21.163
embryo, 24 hours imbibition	SRX1298738	16.822
pre-meiotic interphase anther, floret length 2.6-2.8	SRX2371441	5.612
meiosis stage anther, floret length 3.8-4.0	SRX2371442	6.595
single microspore stage anther, floret length 5.0-5.5	SRX2371443	7.293
bi-cellular pollen stage anther, floret length >6.5	SRX2371444	4.641
megasporocyte formation stage ovary, floret length 2.6-2.8	SRX2371450	2.85
megasporocyte meiosis stage ovary, floret length 3.8-4.0	SRX2371451	3.654
functional megaspore formation stage ovary, floret length 5.0-5.5	SRX2371452	2.493
eight-nucleate embryo sac developing-stage ovary, floret length >6.5	SRX2371453	5.064
endosperm, 7 to 8 DAF	SRX248517	11.875
embryo, 7 to 8 DAF	SRX248518	20.717
spikelets, anther development stage 3	GSM2048325	5.25
spikelets, anther development stage 3	GSM2048326	5.238
spikelets, anther development stage 3	GSM2048327	5.218
spikelets, anther development stage 5	GSM2048328	5.234
spikelets, anther development stage 5	GSM2048329	5.277
spikelets, anther development stage 5	GSM2048330	5.277
spikelets, anther development stage 7	GSM2048331	4.853
spikelets, anther development stage 7	GSM2048332	4.86
spikelets, anther development stage 7	GSM2048333	4.848

## Sheet: README
For all reads producing in this study (SRX5757 prefix), PCR duplicates were removed before mapping to the genome and counting reads.
