# Supplementary material for: Genome-wide redistribution of 24-nt siRNAs in rice gametes
Source: HighWire-hosted journal article supplement (doi:10.1101/gr.253674.119), 2020-01-02
Supplement: Supplemental_Table_2.xlsx [file Supplemental_Table_2.xlsx]

## Sheet: WGBS library summaries
Tissue	WGBS library ID	SRA accession	WGBS library type	genome coverage
egg	egg_100_1	SRX5757683	PBAT	11.0507
egg	egg_100_2	SRX5757684	PBAT	6.44329
sperm	sperm1	SRX5757685	PBAT	7.20947
egg	EC_Park	SRX2343944	PBAT	6
central cell	CC_Park	SRX2343945	PBAT	6
sperm	WT-sperm_Kim	SRX5394957	PBAT	8.05734
pollen vegetative cell	WT-vegetative_Kim	SRX5394958	PBAT	6.07903
ros1a sperm	ros1a-sperm_Kim	SRX5394959	PBAT	5.46808
ros1a pollen vegetative cell	ros1a-vegetative_Kim	SRX5394960	PBAT	4.69868
embryo	wt1_em	SRX5757689	conventional	5.97962
embryo	wt2_em	SRX5757690	conventional	5.595
embryo	wt3_em	SRX5757680	conventional	5.12061
drm2 embryo	52_38em	SRX5757681	conventional	5.78738
drm2 embryo	52_39em	SRX5757706	conventional	4.69191
drm2 embryo	52_40em	SRX5757707	conventional	4.48124
endosperm	wt1_en	SRX5757711	conventional	5.26368
endosperm	wt2_en	SRX5757708	conventional	5.60338
endosperm	wt3_en	SRX5757709	conventional	4.69191
drm2 endosperm	52_38en	SRX5757714	conventional	6.58715
drm2 endosperm	52_39en	SRX5757715	conventional	9.00433
drm2 endosperm	52_40en	SRX5757667	conventional	5.02272
ovary (whole)	ov1	SRX5757663	conventional	3.73415
ovary (whole)	ov2	SRX5757662	conventional	3.04937
ovary (whole)	ov3	SRX5757661	conventional	3.62025
ovary (whole)	ov4	SRX5757660	conventional	3.26782
ovary (whole)	ov5	SRX5757659	conventional	2.97213
ovary (whole)	ov6	SRX5757658	conventional	2.94873
bract	br1	SRX5757696	conventional	3.88335
bract	br2	SRX5757697	conventional	4.65289
bract	br3	SRX5757698	conventional	4.07657
bract	br4	SRX5757699	conventional	3.00277
bract	br5	SRX5757700	conventional	2.81051
bract	br6	SRX5757701	conventional	3.0812
12 day seedling	control_Tan	SRX1760726	conventional	3.6
drm2 12 day seedling	drm2_Tan	SRX1760729	conventional	3.4
ddm1 12 day seedling	ddm1_Tan	SRX1760725	conventional	3.1

## Sheet: README
Genome coverage = total bases of uniquely mapping reads divided by genome size
WGBS = whole genome bisulfite sequencing
PBAT = Post-bisulfite adapter tagging
