# Supplementary material for: Genome-wide redistribution of 24-nt siRNAs in rice gametes
Source: HighWire-hosted journal article supplement (doi:10.1101/gr.253674.119), 2020-01-02
Supplement: Supplemental_Table_3.xlsx [file Supplemental_Table_3.xlsx]

## Sheet: miRNA clusters
miR	cluster_name
osa-miR11336-5p	10
osa-miR1320-3p	1
osa-miR1320-5p	4
osa-miR1423-3p	2
osa-miR1423-5p	3
osa-miR1425-3p	2
osa-miR1425-5p	2
osa-miR1428a-3p	1
osa-miR1428a-5p	6
osa-miR1428e-3p	1
osa-miR1428e-5p	1
osa-miR1428f-5p	1
osa-miR1428g-5p	1
osa-miR1429-3p	4
osa-miR1429-5p	1
osa-miR1431	1
osa-miR1432-3p	1
osa-miR1432-5p	1
osa-miR1437b-3p	1
osa-miR1437b-5p	4
osa-miR156a	3
osa-miR156b-3p	1
osa-miR156b-5p	3
osa-miR156c-3p	1
osa-miR156c-5p	3
osa-miR156d	3
osa-miR156e	3
osa-miR156f-3p	1
osa-miR156f-5p	3
osa-miR156g-3p	1
osa-miR156g-5p	3
osa-miR156h-3p	1
osa-miR156h-5p	3
osa-miR156i	3
osa-miR156j-3p	2
osa-miR156j-5p	3
osa-miR156k	3
osa-miR156l-3p	1
osa-miR156l-5p	1
osa-miR159a.1	8
osa-miR159a.2	1
osa-miR159b	8
osa-miR159c	8
osa-miR159d	8
osa-miR159e	8
osa-miR159f	4
osa-miR160a-3p	6
osa-miR160a-5p	4
osa-miR160b-3p	6
osa-miR160b-5p	4
osa-miR160c-3p	1
osa-miR160c-5p	4
osa-miR160d-5p	4
osa-miR160e-5p	4
osa-miR160f-3p	10
osa-miR160f-5p	13
osa-miR162a	3
osa-miR162b	2
osa-miR164a	2
osa-miR164b	2
osa-miR164c	2
osa-miR164d	2
osa-miR164e	2
osa-miR164f	2
osa-miR166a-3p	2
osa-miR166a-5p	1
osa-miR166b-3p	4
osa-miR166b-5p	1
osa-miR166c-3p	2
osa-miR166c-5p	2
osa-miR166d-3p	2
osa-miR166d-5p	14
osa-miR166e-3p	1
osa-miR166e-5p	1
osa-miR166f	4
osa-miR166g-3p	2
osa-miR166g-5p	1
osa-miR166h-3p	2
osa-miR166h-5p	1
osa-miR166i-3p	1
osa-miR166i-5p	1
osa-miR166k-3p	2
osa-miR166k-5p	1
osa-miR166l-3p	2
osa-miR166l-5p	1
osa-miR166m	2
osa-miR167a-3p	8
osa-miR167a-5p	12
osa-miR167b	12
osa-miR167c-5p	12
osa-miR167d-3p	1
osa-miR167d-5p	4
osa-miR167e-3p	2
osa-miR167e-5p	1
osa-miR167f	2
osa-miR167g	2
osa-miR167h-3p	1
osa-miR167h-5p	4
osa-miR167i-3p	1
osa-miR167i-5p	2
osa-miR167j	2
osa-miR168a-3p	1
osa-miR168a-5p	1
osa-miR169a	6
osa-miR169b	1
osa-miR169c	1
osa-miR169f.1	6
osa-miR169f.2	1
osa-miR169g	6
osa-miR169h	1
osa-miR169i-3p	1
osa-miR169i-5p.1	1
osa-miR169i-5p.2	1
osa-miR169j	1
osa-miR169k	1
osa-miR169l	1
osa-miR169m	6
osa-miR169n	6
osa-miR169p	1
osa-miR169q	6
osa-miR169r-3p	1
osa-miR169r-5p	12
osa-miR171b	2
osa-miR171c-3p	2
osa-miR171c-5p	1
osa-miR171d-3p	1
osa-miR171d-5p	1
osa-miR171e-3p	1
osa-miR171e-5p	1
osa-miR171f-3p	2
osa-miR171f-5p	1
osa-miR171h	4
osa-miR171i-3p	1
osa-miR171i-5p	1
osa-miR172a	1
osa-miR172b	4
osa-miR172d-3p	1
osa-miR172d-5p	1
osa-miR1846a-3p	8
osa-miR1846a-5p	1
osa-miR1846b-3p	12
osa-miR1846b-5p	8
osa-miR1846c-5p	1
osa-miR1846d-3p	10
osa-miR1846d-5p	12
osa-miR1846e	7
osa-miR1849	3
osa-miR1850.1	11
osa-miR1851	10
osa-miR1856	1
osa-miR1857-3p	1
osa-miR1857-5p	1
osa-miR1859	1
osa-miR1860-3p	1
osa-miR1860-5p	5
osa-miR1861b	1
osa-miR1861e	6
osa-miR1861f	1
osa-miR1861h	1
osa-miR1861i	9
osa-miR1861j	1
osa-miR1861k	1
osa-miR1861l	1
osa-miR1861m	1
osa-miR1861n	1
osa-miR1862a	5
osa-miR1862b	5
osa-miR1862c	5
osa-miR1862d	5
osa-miR1862e	5
osa-miR1863a	3
osa-miR1863b	3
osa-miR1863b.2	5
osa-miR1863c	5
osa-miR1864	2
osa-miR1865-3p	14
osa-miR1865-5p	5
osa-miR1868	5
osa-miR1869	11
osa-miR1870-3p	1
osa-miR1870-5p	3
osa-miR1871	11
osa-miR1872	1
osa-miR1873	1
osa-miR1874-3p	13
osa-miR1874-5p	15
osa-miR1875	1
osa-miR1876	11
osa-miR1877	13
osa-miR1878	3
osa-miR1879	11
osa-miR1880	1
osa-miR1881	13
osa-miR1882e-3p	6
osa-miR1883a	5
osa-miR1883b	5
osa-miR2055	4
osa-miR2090	14
osa-miR2095-5p	7
osa-miR2103	8
osa-miR2106	13
osa-miR2118a	5
osa-miR2118b	15
osa-miR2118c	4
osa-miR2118d	9
osa-miR2118e	7
osa-miR2118f	11
osa-miR2118g	10
osa-miR2118h	15
osa-miR2118i	10
osa-miR2118j	9
osa-miR2118k	7
osa-miR2118m	7
osa-miR2118n	15
osa-miR2118o	7
osa-miR2118p	7
osa-miR2118q	8
osa-miR2118r	7
osa-miR2275d	7
osa-miR2863a	1
osa-miR2863b	1
osa-miR2863c	1
osa-miR2864.1	1
osa-miR2864.2	1
osa-miR2865	1
osa-miR2867-3p	5
osa-miR2870	4
osa-miR2871a-3p	1
osa-miR2871a-5p	1
osa-miR2871b-3p	2
osa-miR2873a	1
osa-miR2874	1
osa-miR2876-3p	3
osa-miR2876-5p	3
osa-miR2877	1
osa-miR2878-3p	1
osa-miR2878-5p	3
osa-miR2879	1
osa-miR2880	11
osa-miR319a-3p	2
osa-miR319a-3p.2-3p	4
osa-miR319a-5p	1
osa-miR319b	4
osa-miR390-3p	2
osa-miR390-5p	4
osa-miR393a	1
osa-miR393b-3p	1
osa-miR393b-5p	1
osa-miR394	4
osa-miR395a	2
osa-miR395b	1
osa-miR395c	1
osa-miR395d	1
osa-miR395e	1
osa-miR395f	1
osa-miR395g	1
osa-miR395h	2
osa-miR395i	1
osa-miR395j	1
osa-miR395k	1
osa-miR395l	1
osa-miR395m	1
osa-miR395n	1
osa-miR395p	1
osa-miR395q	1
osa-miR395s	1
osa-miR395y	2
osa-miR396a-3p	1
osa-miR396a-5p	13
osa-miR396b-3p	4
osa-miR396b-5p	10
osa-miR396c-3p	1
osa-miR396c-5p	4
osa-miR396e-3p	1
osa-miR396e-5p	1
osa-miR396f-3p	1
osa-miR396f-5p	2
osa-miR396g	2
osa-miR396h	2
osa-miR3979-5p	1
osa-miR397a	1
osa-miR397b	1
osa-miR3982-3p	1
osa-miR398a	7
osa-miR398b	2
osa-miR399d	1
osa-miR399i	9
osa-miR399j	1
osa-miR408-3p	8
osa-miR408-5p	12
osa-miR435	2
osa-miR440	1
osa-miR5077	7
osa-miR5082	9
osa-miR5083	7
osa-miR5143a	5
osa-miR5143b	5
osa-miR5144-3p	2
osa-miR5144-5p	4
osa-miR5145	2
osa-miR5149	13
osa-miR5150-3p	3
osa-miR5150-5p	3
osa-miR5151	3
osa-miR5156	2
osa-miR5157a-3p	1
osa-miR5157a-5p	1
osa-miR5157b-3p	1
osa-miR5157b-5p	1
osa-miR5158	3
osa-miR5159	11
osa-miR528-3p	4
osa-miR528-5p	8
osa-miR529a	2
osa-miR529b	2
osa-miR531c	6
osa-miR535-3p	4
osa-miR535-5p	12
osa-miR5484	9
osa-miR5485	9
osa-miR5489	13
osa-miR5493	10
osa-miR5501	11
osa-miR5504	15
osa-miR5508	1
osa-miR5513	1
osa-miR5519	10
osa-miR5525	10
osa-miR5542	3
osa-miR5788	1
osa-miR5790	9
osa-miR5792	13
osa-miR5793	9
osa-miR5797	9
osa-miR5805	3
osa-miR5807	11
osa-miR5813	1
osa-miR5814	14
osa-miR5823	11
osa-miR5827	1
osa-miR5830	1
osa-miR6246	12
osa-miR6248	4
osa-miR6250	9
osa-miR6251	1
osa-miR6253	10
osa-miR7693-3p	1
osa-miR7693-5p	1
osa-miR7694-3p	1
osa-miR7694-5p	1
osa-miR7695-3p	1
osa-miR7695-5p	6
osa-miR810b.1	4
osa-miR810b.2	1
osa-miR812f	2
osa-miR812g	1
osa-miR812h	1
osa-miR812i	1
osa-miR812j	1
osa-miR812n-3p	5
osa-miR812n-5p	3
osa-miR812p	14
osa-miR812t	3
osa-miR812u	1
osa-miR820a	3
osa-miR820b	3
osa-miR820c	3

## Sheet: README
Clustering analyses were performed using hierarchical clustering, and assignment of miRNA into clusters was done using the Dynamic Tree Cut R package (Langfelder et al. 2008).
The first column is the miRNA name from miRBase version 22 (Kozomara et al. 2019).
The second column indicates the cluster name for each miRNA.
See also supplemental Fig. S1.
