# Supplementary material for: Genome-wide redistribution of 24-nt siRNAs in rice gametes
Source: HighWire-hosted journal article supplement (doi:10.1101/gr.253674.119), 2020-01-02
Supplement: Supplemental_Table_4.xlsx [file Supplemental_Table_4.xlsx]

## Sheet: phasiRNA loci
21-nt phasiRNA				24-nt phasiRNA loci
1	2231074	2231365		1	11199162	11199424
1	2238974	2239055		2	6001453	6001835
1	2239679	2240096		2	6004128	6004486
1	2240514	2240742		2	6010847	6011325
1	2242050	2242236		2	6828198	6828460
1	2242254	2242461		2	6840294	6840604
1	2244175	2244550		2	6846977	6847215
1	2312939	2313251		2	6858746	6859152
1	2314699	2315094		3	12874980	12875194
1	2317304	2317574		4	9109194	9109456
1	2319302	2319635		4	9136101	9136363
1	2319960	2320272		4	16016526	16016980
1	2324285	2324702		4	18234186	18234400
1	2325387	2325846		4	27780653	27780867
1	2327743	2327992		5	1009867	1010225
1	2329116	2329554		5	1028224	1028438
1	2330502	2330772		5	6713556	6713746
1	2331683	2332079		5	7907675	7907913
1	2333006	2333234		5	17796248	17796510
1	2333917	2334250		5	17801992	17802278
1	2334854	2335334		5	20392768	20392982
1	2342046	2342400		6	1658070	1658380
1	2343012	2343366		6	1661099	1661337
1	2345887	2346220		6	1665753	1666015
1	2347150	2347546		6	7909191	7909573
1	2347941	2348358		6	25263322	25263560
1	2349157	2349553		6	25366411	25366769
1	10960748	10960976		6	25428091	25428449
1	14156183	14156453		6	25434490	25434752
1	18307779	18307902		6	25442916	25443178
1	19140181	19140777		6	25503745	25504031
1	19144954	19145350		6	25509621	25509883
1	20077014	20077263		6	25516961	25517511
1	20082996	20083518		6	25839677	25840083
1	20084274	20084733		7	5831168	5831526
1	20084547	20084754		7	5845974	5846332
1	20086160	20086472		7	6217533	6217723
1	20089343	20089655		7	7577425	7577687
1	20108099	20108411		8	808840	809246
1	20404515	20404827		8	6195470	6195756
1	20417982	20418357		8	9044746	9044960
1	20421200	20421491		8	20984061	20984323
1	20452607	20453129		8	22324511	22324773
1	20455405	20455780		10	10808153	10808415
1	20457638	20457971		10	11842696	11843078
1	20462614	20462989		10	11872746	11873272
1	34219202	34219640		10	12917961	12918271
1	34222218	34222824		10	20090892	20091082
1	34224628	34224898		11	10832773	10833035
1	34226064	34226292		11	23103202	23103464
1	34227269	34227581		11	23114047	23114357
1	34229043	34229481		11	23126316	23126482
1	34231553	34232075		11	25567053	25567435
1	34254381	34254651		11	25570005	25570267
1	34256844	34257366		11	25575860	25576146
1	34261976	34262309		11	27480993	27481231
1	34278613	34278883		12	4660556	4660842
1	34281602	34281998		12	4683962	4684128
1	34285425	34285716		12	22728898	22729208
1	34287370	34287640		12	22735039	22735301
1	34289628	34290129		12	22740101	22740363
1	34291053	34291596		12	22749587	22749825
1	38470633	38470840		12	22755858	22756120
1	38528324	38528489		12	22777822	22778108
2	1486793	1487231		12	22787443	22787729
2	1487616	1487865		12	23211179	23211393
2	1488312	1488666		12	25441425	25441687
2	1489882	1490173		12	26080839	26081269
2	1494775	1495066
2	1498528	1498924
2	1514598	1515099
2	1516766	1517015
2	1517946	1518384
2	1520012	1520450
2	1522769	1523249
2	1523682	1523931
2	1527334	1527688
2	1528471	1528930
2	1530411	1530807
2	1531436	1531790
2	10561969	10562155
2	10565420	10565690
2	10566746	10567142
2	10611892	10612205
2	10616649	10617045
2	10619503	10619941
2	10620925	10621237
2	10630182	10630452
2	10630842	10631448
2	10642377	10642857
2	10644749	10645019
2	10654427	10654928
2	10676024	10676588
2	10931779	10932091
2	12243909	12244158
2	12250893	12251310
2	12251187	12251352
2	12272936	12273290
2	12274747	12274975
2	12291039	12291372
2	12291954	12292182
2	12296437	12296917
2	12298392	12298557
2	12298392	12298851
2	12299813	12300125
2	15776776	15777130
2	15792482	15792710
2	15795692	15796025
2	15808228	15808603
2	15821722	15821971
2	16558002	16558377
2	16559248	16559623
2	16560051	16560300
2	16566144	16566540
2	16567042	16567354
2	16568776	16569046
2	16570229	16570541
2	16573418	16573667
2	16578426	16578717
2	16596615	16597116
2	20200358	20201263
2	20202083	20202458
2	20246768	20247143
2	20248420	20248816
2	20250015	20250285
2	20251485	20251860
2	20252700	20253192
2	20253838	20254129
2	20257090	20257402
2	20259469	20259844
2	20262070	20262340
2	20263222	20263471
2	20266901	20267255
2	20270848	20271223
2	20272826	20273159
2	20275038	20275371
2	20276348	20276555
2	20277825	20278053
2	20281791	20282145
2	20284997	20285351
2	20298279	20298591
2	20305760	20306114
2	20308790	20309102
2	20310086	20310587
2	20311455	20311683
2	20322647	20323169
2	20327487	20327820
2	20328918	20329251
2	20332586	20332982
2	20334141	20334572
2	20335713	20335941
2	20336867	20337011
2	20343891	20344056
2	20347354	20347750
2	20349401	20350396
2	20350063	20350459
2	20351462	20351816
2	20352146	20352374
2	20353170	20353545
2	20356770	20357103
2	20358251	20358626
2	20360542	20360812
2	20363519	20363873
2	20393696	20394175
2	20396760	20397240
2	20397962	20398253
2	20403812	20404271
2	20419334	20419562
2	20484298	20484568
2	22829470	22829845
2	22834030	22834531
2	22839961	22840462
2	22845713	22846109
2	22849371	22849855
2	22851938	22852481
2	22853247	22853559
2	22854820	22855258
2	22856494	22856932
2	22858288	22858810
2	22859697	22860030
2	22860892	22861351
2	22864218	22864677
2	24021977	24022205
2	34457315	34457585
3	3250576	3250783
3	11276257	11276506
3	14159306	14159471
3	18585911	18586265
3	18586805	18587096
3	18588238	18589207
3	18588916	18589186
3	18591364	18591718
3	18594336	18594868
3	26774363	26774654
3	26833851	26834247
3	26837712	26838045
3	26838775	26839150
3	26839591	26839882
3	26841563	26841812
3	26843110	26843338
3	26846613	26846862
3	26848873	26849269
3	26851414	26851831
3	26852974	26853202
3	26855145	26855603
3	26856827	26857055
3	26859560	26859956
3	26861825	26862053
3	27554953	27556016
3	27555704	27556716
3	27555704	27556037
3	27557930	27558740
3	27558575	27558824
3	27559969	27560344
3	27561001	27561271
3	27563978	27564269
3	27564994	27565590
3	27567071	27567341
3	27569307	27569798
3	27572342	27572465
3	27574360	27574772
3	27575498	27575850
3	27580050	27580362
3	27624668	27625001
3	27632181	27632577
3	27633954	27634266
3	27635702	27636161
3	27639840	27640236
3	27640988	27641426
3	27641961	27642189
3	32274858	32275275
3	32276283	32276658
3	32277091	32277466
3	32277948	32278260
3	32278871	32279141
3	32280085	32280418
3	32280782	32280905
3	32293075	32293429
3	32294112	32294592
3	32295866	32296283
3	32297103	32297436
3	32298209	32298521
3	32299921	32300296
3	32302131	32302401
3	32303074	32303365
3	32305065	32305335
3	32305684	32306164
3	32457869	32458055
3	32458983	32459190
3	32477590	32478178
3	32484858	32485107
3	32487361	32487996
3	32494767	32495142
3	32495940	32496294
3	32497122	32497539
3	32498303	32499056
3	32503421	32503838
3	32505602	32506082
3	32507285	32507744
3	32508257	32508800
3	32511901	32512213
3	32512620	32513121
4	11588912	11589140
4	11592632	11593070
4	12679380	12679734
4	12693477	12693684
4	12965067	12965400
4	12969936	12970248
4	12974831	12975248
4	12979482	12979815
4	13025793	13026063
4	13113229	13113457
4	13114398	13114689
4	13123801	13124071
4	13137211	13137481
4	13150635	13151031
4	13151469	13151991
4	13157160	13157451
4	13164092	13164551
4	13168651	13169131
4	13170324	13170594
4	13253590	13253944
4	13254468	13254801
4	13272001	13272292
4	13281533	13281908
4	13311805	13312117
4	13316135	13316489
4	13331919	13332252
4	13341112	13341403
4	13355600	13355744
4	13356466	13356736
4	13358750	13359230
4	13391199	13391616
4	13393375	13393813
4	13394948	13395302
4	14190242	14190428
4	14217852	14218101
4	14221115	14221511
4	14223809	14223911
4	14267655	14268114
4	14271982	14272252
4	14279520	14279811
4	14283690	14283939
4	14286092	14286404
4	14286949	14287429
4	14289388	14289679
4	14290786	14291245
4	14293084	14293375
4	14295434	14295746
4	14298524	14298815
4	14303808	14304133
4	14326792	14326957
4	14327065	14327209
4	14328275	14328629
4	14337392	14337767
4	14341106	14341460
4	14343866	14344199
4	14346400	14346691
4	14350894	14351227
4	14356353	14356665
4	14369984	14370296
4	14371685	14371997
4	14373836	14374211
4	14475171	14475483
4	14480891	14481140
4	14554148	14554376
4	14556262	14556595
4	14565338	14565713
4	14589458	14589812
4	14591790	14591997
4	14601203	14601473
4	14601940	14602231
4	14605559	14605913
4	14617981	14618209
4	14620972	14621221
4	14621898	14622210
4	14633158	14633386
4	14634541	14634685
4	14634768	14634996
4	14638124	14638478
4	14638883	14639321
4	14642570	14642924
4	14648091	14648582
4	14648438	14648561
4	14649726	14650059
4	14652876	14653167
4	14660125	14660395
4	14668823	14669282
4	14685225	14685642
4	14723714	14724005
4	14727366	14727594
4	14731542	14731728
4	14875739	14876009
4	14881203	14881452
4	14885177	14885489
4	14900889	14901201
4	14902566	14902962
4	14916634	14916946
4	14922140	14922431
4	14926638	14926929
4	14929132	14929443
4	14931900	14932254
4	14935593	14935968
4	14944574	14944928
4	14951630	14952005
4	14987469	14987794
4	14992787	14993078
4	14995852	14996164
4	14998222	14998513
4	15000352	15000811
4	15001918	15002272
4	15004169	15004649
4	15005194	15005506
4	15007638	15007908
4	15011787	15012015
4	15019357	15019627
4	15023558	15023954
4	15116424	15116778
4	15130201	15130450
4	15172739	15173051
4	15174806	15175297
4	15180636	15180990
4	15184241	15184679
4	15185212	15185440
4	15188570	15188777
4	15188889	15189033
4	15190165	15190498
4	15205540	15205894
4	15207808	15208099
4	15222649	15222898
4	15223514	15223679
4	15227135	15227384
4	15252583	15252811
4	15255632	15255965
4	15256495	15256807
4	15265376	15265751
4	15272342	15272675
4	15274301	15274466
4	17115995	17116223
4	17196319	17196652
4	17199955	17200414
4	17211131	17211506
4	17212297	17212483
4	17214134	17214362
4	17214917	17215229
4	17216625	17216958
4	17219660	17219867
4	17226492	17226909
4	17229964	17230297
4	17233090	17233465
4	17241727	17242123
4	17244231	17244438
4	17245566	17245773
4	17248273	17248711
4	17250290	17250623
4	17251096	17251345
4	17341723	17342119
4	17355596	17355782
4	17363357	17363564
4	17365387	17365573
4	17370461	17370773
4	17371365	17371530
4	17385270	17385624
4	17390746	17390953
4	17391420	17391690
4	17397270	17397393
4	17417098	17417410
4	17419053	17419470
4	17422382	17422589
4	17423379	17423733
4	17426923	17427130
4	17438129	17438420
4	17461542	17461812
4	17464792	17465209
4	17466217	17466424
4	17466892	17467330
4	17469098	17469368
4	17470882	17471110
4	17471614	17471905
4	17473593	17473884
4	17473593	17474495
4	17478215	17478485
4	17484827	17485265
4	17488065	17488440
4	17498299	17498548
4	17501067	17501442
4	17514518	17514725
4	17547094	17547511
4	17554241	17554574
4	17567971	17568199
4	17568983	17569295
4	17570128	17570335
4	17578128	17578251
4	17580561	17580768
4	17605939	17606335
4	17607174	17607528
4	17624420	17624648
4	17628192	17628588
4	17629156	17629447
4	17633809	17633995
4	17634024	17634252
4	17638061	17638436
4	17641496	17641871
4	17654412	17654640
4	17656542	17657127
4	17658612	17658987
4	17660213	17660630
4	17661201	17661639
4	17663106	17663523
4	17664864	17665218
4	17666794	17667106
4	17679913	17680393
4	17696496	17696934
4	17699364	17699613
4	17701862	17702153
4	17705529	17705841
4	17708174	17708402
4	17710966	17711320
4	17714011	17714260
4	17717187	17717604
4	17720312	17720645
4	18140585	18140855
4	18142517	18142934
4	18145507	18145924
4	18147875	18148271
4	18151575	18151824
4	18152322	18152592
4	18153171	18153546
4	18154313	18154751
4	18158640	18158931
4	18164463	18164901
4	18609626	18609917
4	18611825	18612116
4	18612501	18612750
4	18621618	18621846
4	20979729	20980324
4	20982853	20983207
4	20985400	20985754
4	20986290	20986749
4	20987767	20988058
4	20988619	20989036
4	20990315	20991041
4	20993484	20993859
4	20996090	20996465
4	21011373	21011622
4	21012439	21012646
4	21014720	21015011
4	21015837	21016212
4	21017610	21017985
4	21018757	21019316
4	21020317	21020545
4	21022866	21023115
4	21024284	21024722
4	21026666	21027062
4	21027503	21027878
4	21028936	21029269
4	21032390	21032786
4	21037954	21038287
4	21047680	21048055
4	21048499	21048958
4	21051252	21051627
4	21056256	21056694
4	21061583	21061832
4	21062421	21062733
4	21063551	21063737
4	21063803	21064031
4	21066125	21066395
4	21067084	21067438
4	21068107	21068545
4	21074344	21074782
4	21075332	21075770
4	21077063	21077501
4	21077901	21078297
4	21080759	21081092
4	21082979	21083396
4	21084112	21084382
4	21087516	21087996
4	21090256	21090652
4	21091759	21092260
4	21092547	21092922
4	21095370	21095640
4	21099635	21100115
4	21105383	21105800
4	21121480	21121918
4	21137802	21138114
4	21141539	21142040
4	21143167	21143416
4	21144830	21145247
4	21145533	21145950
4	21148609	21148816
4	21149610	21149901
4	21161366	21161678
4	21165608	21165920
4	21167654	21168092
4	21171135	21171321
4	21173803	21174031
4	21175455	21175830
4	21181136	21182066
4	21183890	21184181
4	21191119	21191473
4	21192855	21193146
4	21195813	21196312
4	21198326	21198533
4	21199244	21199879
4	21199693	21199858
4	21200639	21200930
4	21202626	21203064
4	21203449	21203740
4	21223453	21223765
4	21224286	21224577
4	21224978	21225268
4	21225798	21226110
4	21226824	21227094
4	21645079	21645328
4	21650670	21650961
4	21652691	21653108
4	21656185	21656350
4	21656994	21657348
4	24905399	24905606
5	1900933	1901161
5	3086673	3086922
5	3087252	3087480
5	3090956	3091310
5	3092705	3092975
5	3101476	3101893
5	3102568	3102922
5	3103306	3103471
5	3104250	3104688
5	3105308	3105494
5	3106526	3106775
5	3109695	3109923
5	3113786	3113972
5	3116103	3116436
5	3117520	3117748
5	3123375	3123876
5	3124423	3124714
5	3126094	3126427
5	3130509	3130674
5	3131462	3131858
5	3133727	3134228
5	3134719	3134947
5	3137345	3137615
5	3138312	3138560
5	3139351	3139600
5	3140474	3140912
5	3142733	3143087
5	3144381	3144735
5	3146517	3146829
5	3149498	3149957
5	3150641	3150974
5	3159806	3160202
5	3164265	3164514
5	3168218	3168341
5	3168218	3169212
5	3171074	3171302
5	5835182	5835410
5	6096824	6097199
5	6099519	6099873
5	6100486	6100819
5	6103331	6103622
5	6104750	6105300
5	6106649	6107024
5	6131590	6131965
5	6133164	6133497
5	6140487	6140820
5	6141249	6141645
5	6143136	6143406
5	6143841	6144237
5	7331239	7331598
5	8107914	8108163
5	8119184	8119516
5	8139232	8139523
5	8151967	8152216
5	8177091	8177592
5	8184354	8184687
5	8185431	8185617
5	8187587	8187878
5	8201720	8201948
5	8230864	8231197
5	8245199	8245490
5	8246860	8247214
5	8248412	8248619
5	8249170	8249503
5	8309469	8309634
5	8311653	8312049
5	11013972	11014200
5	13938209	13938479
5	13956621	13956891
5	13959514	13959931
5	13962272	13962689
5	13976412	13976850
5	13979031	13979448
5	13984153	13984633
5	13986604	13987000
5	13993288	13993747
5	14006467	14006968
5	14013684	14014164
5	14017455	14017851
5	19141827	19142223
5	24171406	24171634
5	24787942	24788170
5	24789850	24790162
5	24797727	24798060
5	24802153	24802339
5	24804107	24804419
5	24806099	24806516
5	24813109	24813505
5	24823904	24824426
5	24825022	24825334
5	24833655	24833925
5	24835379	24835922
5	24837026	24837233
5	24839252	24839690
5	24852177	24852573
5	24853538	24854039
5	24857839	24857920
5	24860595	24860928
5	24867329	24867578
5	24868360	24868588
5	24870411	24870849
5	24872784	24873201
5	24873693	24873984
5	24875147	24875354
5	24877361	24877956
5	24879184	24879433
5	24879911	24880223
5	24880546	24880795
5	24887585	24887897
5	24888608	24889067
5	24891273	24891711
5	24892008	24892320
5	24893468	24893885
5	24896099	24896663
5	24901217	24901424
5	24906104	24906458
5	24907229	24907782
5	24908117	24908597
5	24910836	24911232
5	24912379	24912754
5	24914565	24914772
5	24927070	24927256
5	24953234	24953588
5	24955274	24955607
5	24960846	24961074
5	24962397	24962869
5	24965369	24965933
5	24968586	24968835
5	24974485	24974923
5	25059346	25059700
5	25062271	25062625
5	25066701	25067013
5	25068858	25069107
5	25069926	25070301
5	25071431	25071743
5	25074919	25075231
5	25077814	25078210
5	25089677	25090307
5	25090940	25091168
5	25092131	25092485
5	25095096	25095366
5	25097062	25097669
5	25100632	25100986
5	25102821	25103175
5	25105655	25106051
5	25106840	25107428
5	25113424	25113568
5	25127065	25127272
5	25128242	25128512
5	25129464	25130175
5	25130770	25131355
5	25132541	25132979
5	25140221	25140701
5	25143605	25143980
5	25145579	25146101
5	25147286	25147577
5	25148066	25148420
5	25151325	25151721
6	673569	673902
6	1794692	1795109
6	1795788	1796163
6	1798930	1799326
6	1801303	1802211
6	1804229	1804541
6	4734416	4734812
6	4735198	4735552
6	4736122	4736674
6	4736143	4736371
6	4737221	4737925
6	4739348	4739576
6	4740249	4740561
6	4740904	4741216
6	4742091	4742256
6	4742175	4742834
6	4743948	4744390
6	4744246	4744390
6	4746524	4746836
6	4747396	4747918
6	4753604	4753895
6	4754466	4754778
6	4758610	4759048
6	4764740	4765031
6	4766258	4766759
6	4769310	4769682
6	4771667	4772084
6	4775292	4775950
6	4777230	4777836
6	4786918	4787167
6	4788096	4788387
6	4789345	4789615
6	4790462	4790795
6	4795959	4796292
6	9436177	9436573
6	9438200	9438386
6	9438389	9438638
6	9440118	9440388
6	9441666	9441915
6	9453672	9454026
6	9463263	9463596
6	9468234	9468546
6	9470835	9471273
6	9479143	9479392
6	9492398	9492689
6	9493973	9494600
6	9496193	9496871
6	9496298	9496442
6	9497016	9497118
6	9504957	9505248
6	9511068	9511506
6	9515121	9515538
6	9528822	9529134
6	9532173	9532422
6	9534870	9535287
6	9535744	9536014
6	9539930	9540368
6	9542192	9543020
6	9545805	9546222
6	9573401	9574262
6	9574013	9574241
6	9574670	9574982
6	9577447	9577906
6	9581961	9582420
6	9583277	9583652
6	9588668	9589148
6	9602783	9603116
6	9604580	9604934
6	9652964	9653339
6	9653903	9654215
6	9657005	9657527
6	9658682	9659120
6	9659627	9660191
6	9660672	9661026
6	9664736	9665321
6	9665899	9666421
6	9667664	9667892
6	9669068	9669548
6	9676250	9676730
6	9677126	9677522
6	9677972	9678368
6	9679404	9679884
6	9685322	9685760
6	9686289	9686622
6	9690343	9690970
6	9694411	9694765
6	9696139	9696661
6	9698063	9698417
6	9699932	9700349
6	9701823	9702198
6	9706837	9707359
6	9731030	9731489
6	9736229	9736583
6	9737417	9737834
6	9742490	9742781
6	11758429	11758846
6	11761076	11761472
6	11763293	11764103
6	11765505	11765859
6	11766399	11766690
6	11767708	11768811
6	11768520	11768790
6	11770979	11771333
6	11773836	11774431
6	11808270	11808687
6	11810917	11811313
6	11813249	11813954
6	11815356	11815710
6	11816250	11816541
6	11817685	11818682
6	11818328	11818682
6	11820850	11821204
6	11827960	11828559
6	12021074	12021344
6	12030828	12031224
6	12042962	12043295
6	12050006	12050255
6	13096088	13096442
6	14616244	14616430
6	16916354	16916687
6	16917955	16918267
6	16919398	16919773
6	16938016	16938307
6	16946426	16946738
6	16973364	16973844
6	16985992	16986367
6	17666284	17666554
6	17672854	17673187
6	17692311	17692602
6	17694917	17695292
6	17697557	17698206
6	17701927	17702260
6	17705594	17706074
6	17719873	17720122
6	17743660	17743951
6	17750896	17751292
6	17754596	17754950
6	17769087	17769651
6	17771673	17772006
6	17784816	17785149
6	17788501	17788855
6	17794663	17794870
6	18985626	18986001
6	18986981	18987314
6	18989844	18990198
6	20620625	20620853
6	22355447	22355890
6	23171076	23171409
6	23176072	23176342
6	23178362	23178548
6	23179508	23180072
6	24584642	24585393
6	24584642	24584912
6	24588492	24588783
6	24597221	24597575
6	24600597	24601056
6	24602203	24602494
6	24608153	24609166
6	24617128	24617524
6	24618275	24618734
6	24620109	24620589
6	24622525	24622837
6	24626767	24627037
6	24630169	24630775
6	24631450	24631825
6	24633199	24633553
6	24639169	24639565
6	24640853	24641228
6	24641736	24642714
6	24650365	24650740
6	24657159	24657618
6	24658307	24659154
6	24658737	24658839
6	24661168	24661564
6	24663199	24663616
6	24666693	24666963
6	24674952	24675306
6	24676768	24677227
6	24679228	24679561
6	24682211	24682607
6	24703141	24703726
6	24708634	24709093
6	24709684	24710101
6	24714596	24714803
6	24717068	24718013
6	24717890	24718118
6	24718360	24718714
6	24719458	24719749
6	24722261	24722615
6	24723465	24723924
6	24725088	24725421
6	24728055	24728472
6	24731795	24732023
6	24732717	24732945
6	24739559	24739934
6	24742517	24742745
6	24743406	24743739
6	24745166	24745415
6	24762719	24762968
6	24771349	24771724
6	24772044	24772377
6	24773257	24773443
6	24774337	24774754
6	24775723	24775972
6	24778421	24778712
6	24779786	24780098
6	24781566	24781962
6	24783295	24783607
6	24784612	24784945
6	24789033	24789471
6	26768838	26769108
6	28293371	28293809
6	28294235	28294526
6	28295167	28295563
6	28297667	28298126
6	28298703	28299574
6	28300004	28300316
6	28301283	28301595
6	28302190	28302502
6	28304982	28305273
6	28305003	28305953
6	28307755	28308109
6	28308893	28309311
6	28310391	28310619
6	28312405	28312696
6	28313229	28313604
6	28315008	28315362
6	28316135	28316565
6	28317143	28317539
6	28324179	28324659
6	28325884	28326134
6	28326517	28326871
6	28329479	28329728
6	28330484	28330796
6	28333662	28333953
6	28334380	28334923
6	28336635	28337031
6	28338034	28338388
6	28340508	28340904
6	28342149	28342377
7	1713294	1713480
7	5715737	5716091
7	5717541	5717832
7	5719779	5720070
7	5723115	5723343
7	5728390	5728723
7	5730345	5730720
7	5732248	5732686
7	5733575	5733908
7	5734689	5734980
7	6159906	6160260
7	6339980	6340145
7	6343653	6343965
7	6353990	6354281
7	6357103	6357394
7	6360760	6361072
7	6361710	6362358
7	6364558	6364849
7	6367440	6367836
7	6370099	6370516
7	6372280	6372697
7	6375762	6376200
7	6378711	6378981
7	6418376	6418793
7	6433896	6434376
7	6438960	6439272
7	6591970	6592282
7	6594952	6595306
7	6597758	6598070
7	6623629	6624004
7	6641160	6641451
7	6646795	6647023
7	6657735	6658152
7	6666468	6666738
7	6670288	6670369
7	6672048	6672486
7	6675894	6676206
7	6680288	6680978
7	6682563	6683064
7	6687079	6687559
7	6693472	6693700
7	6703535	6703973
7	6707763	6708054
7	6718450	6718741
7	6720154	6720529
7	6721394	6721706
7	6722767	6723121
7	6727498	6727726
7	6868014	6868604
7	6869327	6869765
7	6872114	6872426
7	6873172	6873673
7	6876129	6876504
7	6882760	6883198
7	6889966	6890194
7	6893663	6894038
7	6900722	6901160
7	6901504	6901942
7	6906295	6906754
7	6907443	6907839
7	6910132	6910360
7	6912295	6912628
7	6915405	6915717
7	6920392	6920746
7	6921590	6922373
7	6926535	6926910
7	6934721	6935117
7	6935554	6935866
7	6937776	6938130
7	6938668	6939148
7	6941307	6941619
7	6942913	6943435
7	6947235	6947484
7	6973410	6973848
7	6975898	6976168
7	6979541	6979853
7	6983075	6983366
7	6984513	6984825
7	6990665	6991040
7	6992066	6992336
7	6992996	6993392
7	7001329	7001724
7	7002757	7002985
7	7006639	7006972
7	7008460	7008625
7	7009785	7010034
7	7028162	7028453
7	7031014	7031305
7	7032060	7032309
7	7033378	7033711
7	7037590	7038028
7	7040813	7041083
7	7052459	7052792
7	7060212	7060398
7	7061301	7061869
7	7066473	7066785
7	7069595	7069928
7	7071756	7072278
7	7073574	7074336
7	7097977	7098373
7	7100964	7101297
7	8547327	8547597
7	8551025	8551211
7	8560589	8561010
7	8600937	8601333
7	8654051	8654300
7	8663368	8663848
7	8664329	8664557
7	8668925	8669384
7	8670767	8671142
7	8713064	8713418
7	8715829	8716183
7	8720615	8720927
7	8736238	8736655
7	8739836	8740127
7	8747084	8747312
7	8751267	8751600
7	8774228	8774477
7	9027891	9028161
7	9032195	9032570
7	9043121	9043643
7	9068812	9069166
7	9213581	9213851
7	9270669	9270897
7	9271714	9271963
7	9273387	9273804
7	9408770	9408998
7	9409527	9409818
7	9427961	9428357
7	9432641	9432911
7	9442195	9442423
7	9444151	9444526
7	9487568	9488048
7	9488746	9489100
7	9493470	9494013
7	9496497	9496746
7	9496812	9497082
7	9501926	9502154
7	9514040	9514331
7	9524074	9524386
7	9526184	9526685
7	9528785	9529118
7	9536888	9537221
7	9613618	9614014
7	9878762	9878990
7	9879852	9880101
7	9938449	9938782
7	12482323	12482698
7	13678979	13679354
7	13686964	13687192
7	13691910	13692180
7	13710778	13711090
7	13714376	13714646
7	13715549	13715756
7	13715930	13716095
7	13716857	13717106
7	13719295	13719418
7	13731841	13732195
7	13734962	13735316
7	14945766	14946230
7	14973500	14973728
7	15007694	15008258
7	15247199	15247490
7	15253357	15253627
7	15263184	15263454
7	15266564	15266771
7	15271731	15272001
7	15279622	15279913
7	15942307	15942703
7	15946269	15946644
7	15950262	15950721
7	15951504	15951837
7	15953435	15953705
7	15956044	15956335
7	15960074	15960239
7	15966998	15967184
7	15967651	15968026
7	15980649	15981129
7	16039343	16039529
7	16042316	16042691
7	16046327	16046681
7	16054939	16055209
7	16058956	16059394
7	16059512	16059845
7	16060420	16060669
7	16115006	16115423
7	16116252	16116459
7	16116778	16116985
7	16117243	16117534
7	17283814	17284084
7	17285453	17285786
7	17287464	17287902
7	17289130	17289463
7	17293438	17293813
7	17296730	17297231
7	17299052	17299238
7	17312236	17312548
7	17336160	17336472
7	17339042	17339291
7	17339883	17340216
7	17340729	17341104
7	19556120	19556285
8	342840	343110
8	2437298	2437673
8	2438489	2439469
8	2439283	2439490
8	2439905	2440280
8	2441643	2442039
8	2455601	2455745
8	2456635	2457772
8	2457649	2457856
8	2458423	2458882
8	2460317	2460566
8	2461155	2461551
8	2462212	2462713
8	2463568	2464174
8	2469868	2470201
8	2470390	2470938
8	2473647	2473938
8	2474368	2474848
8	2476952	2477285
8	2478351	2478579
8	2479699	2480137
8	2482737	2482986
8	2503626	2504022
8	2506508	2506799
8	2642758	2643112
8	2643808	2644246
8	2644819	2645068
8	2664220	2664532
8	2671540	2671831
8	2672239	2672677
8	2673596	2673992
8	2674868	2675243
8	2675884	2676280
8	2685044	2685377
8	2690544	2690793
8	2692638	2693055
8	2693387	2693720
8	2750224	2750494
8	2756201	2756471
8	5732485	5733049
8	5737571	5737673
8	5738766	5739078
8	5740535	5740973
8	5743577	5743910
8	11144865	11145093
8	14127065	14127335
8	14722826	14723075
8	14724746	14725121
8	16667409	16667763
8	16670059	16670350
8	16684688	16685021
8	16700800	16701028
8	16703324	16703657
8	16724836	16725022
8	16726674	16727112
8	16726674	16727941
8	16735629	16736193
8	16755380	16755755
8	16782383	16782737
8	16867651	16867921
8	17046212	17046461
8	17066993	17067305
8	17069634	17069988
8	17075036	17075138
8	17083210	17083585
8	17084630	17085047
8	17114686	17114935
8	17118390	17118618
8	17119662	17120016
8	17121116	17121491
8	17135951	17136263
8	17148478	17148748
8	17161291	17161813
8	17176797	17177130
8	17177943	17178339
8	18566881	18567193
8	18586846	18587305
8	18587909	18588200
8	18606576	18606930
8	18613891	18614266
8	18615494	18615953
8	18618626	18619106
8	18626258	18626612
8	18635588	18635837
8	18638313	18638562
8	18657286	18657493
8	18659239	18659530
8	18672718	18673135
8	18719527	18720154
8	18726895	18727018
8	18731996	18732476
8	18746448	18746613
8	18780341	18780653
8	18784258	18784444
8	18784510	18784696
8	18791104	18791640
8	18792376	18792520
8	18814575	18814761
8	18816392	18816809
8	18819731	18820106
8	18823493	18823889
8	18827584	18828022
8	18831815	18832127
8	18833626	18834001
8	18834650	18835172
8	18838084	18838375
8	18839207	18839603
8	18840004	18840295
8	18844053	18844281
8	18934110	18934590
8	18942851	18943100
8	18949149	18949440
8	18951931	18952264
9	6603934	6604267
9	6620118	6620451
9	6621285	6621492
9	6622260	6622551
9	6623502	6623835
9	6627629	6627899
9	6629908	6630262
9	6633984	6634485
9	6656245	6656704
9	6657663	6658038
9	6661311	6661728
9	6668706	6668997
9	6678465	6678714
9	6712614	6712989
9	6717978	6718374
9	6732039	6732330
9	6733476	6733662
9	6739881	6740277
9	6757359	6757713
9	6762826	6763096
9	6781195	6781486
9	6798747	6799101
9	6802181	6802493
9	6824138	6824366
9	6845636	6846032
9	6851194	6851485
9	6894281	6894698
9	6896176	6896530
9	6900697	6900967
9	6901517	6901892
9	6910236	6910611
9	6911119	6911515
9	6912989	6913427
9	6919424	6919652
9	6920921	6921044
9	6927497	6927830
9	6928515	6928953
9	6935741	6936158
9	6936933	6937287
9	6938529	6938946
9	6940307	6940724
9	6944625	6945042
9	8733470	8733782
9	8748352	8748517
9	8761026	8761233
9	8761335	8761542
9	8764593	8764863
9	8777068	8777359
9	8784926	8785217
9	8877964	8878255
9	8879286	8879745
9	8884419	8885234
9	8884419	8884626
9	8887558	8888143
9	8896817	8897150
9	8907399	8907585
9	8908926	8909321
9	8909219	8909321
9	8910631	8911132
9	8911781	8911988
9	8912814	8913147
9	8918841	8919111
9	8930431	8930806
9	8936597	8936888
9	8960879	8961338
9	8967541	8967790
9	8977545	8978250
9	8979199	8979637
9	8980928	8981644
9	8981986	8982277
9	8985197	8985446
9	8990621	8991274
9	9003950	9004178
9	9007427	9007802
9	9016039	9016330
9	9021981	9022293
9	9023315	9023774
9	9025613	9025841
9	9046712	9047380
9	9047152	9047464
9	9050848	9051181
9	9064696	9064819
9	9072401	9072587
9	9075056	9075347
9	9077948	9078260
9	9078944	9079130
9	9085709	9085937
9	9091631	9091985
9	9113303	9113678
9	9121738	9121945
9	9137130	9137295
9	9138034	9138409
9	9140778	9140880
9	9141908	9142262
9	9143130	9143505
9	9143934	9144393
9	9144765	9145077
9	9149597	9149825
9	9156682	9157015
9	9171238	9171508
9	9174275	9174797
9	9194026	9194548
9	9197745	9198204
9	9276095	9276323
9	9277545	9278130
9	9284403	9284715
9	9289828	9290203
9	9291332	9291833
9	9297927	9298323
9	9299585	9300002
9	9303316	9303712
9	9324447	9324675
9	9337948	9338323
9	9346974	9347496
9	9350999	9351290
9	9351683	9351848
9	9356453	9356975
9	16207645	16208020
9	22103263	22103617
10	3676151	3676566
10	3679423	3679798
10	3687327	3687597
10	3688036	3688453
10	3703192	3703420
10	3705755	3706193
10	10344552	10344885
10	13959722	13959971
10	13962571	13963072
10	13966392	13966851
10	13973811	13974123
10	13976636	13977200
10	13980623	13980956
10	13982469	13982844
10	13987222	13987555
10	13988304	13989065
10	13990343	13991008
10	13993716	13994049
10	13995235	13995547
10	14011248	14011665
10	14012630	14012984
10	14015674	14015923
10	14023789	14024394
10	14024954	14025455
10	14033039	14033414
10	14033872	14034184
10	14034982	14035273
10	14035580	14035997
10	14036757	14037342
10	14038391	14039048
10	14040812	14041019
10	14041688	14042063
10	14042573	14042801
10	14044926	14045406
10	14045782	14046325
10	14055178	14055490
10	14058200	14058449
10	14060983	14061253
10	14066337	14066838
10	14069423	14069840
10	14071287	14071620
10	14074558	14075038
10	14087830	14088226
10	14089171	14089273
10	14089338	14089797
10	14107871	14108288
10	14108741	14109074
10	14116723	14117077
10	14121768	14122164
10	14123485	14123839
10	14125055	14125365
10	14138774	14139149
10	14140132	14140633
10	14141604	14142042
10	14147644	14147998
10	14179834	14180104
10	14183355	14183625
10	14191301	14191613
10	14193268	14193580
10	14202042	14202312
10	14203072	14203426
10	14207983	14208442
10	14213920	14214232
10	14218825	14219137
10	14220052	14220406
10	14221651	14221984
10	14224207	14224624
10	14227376	14227646
11	3316397	3316835
11	3318791	3319103
11	3322003	3322378
11	7807483	7807711
11	7810378	7810459
11	7810906	7811134
11	7813029	7813299
11	7813239	7813467
11	7814903	7815005
11	7815262	7815490
11	8929550	8930072
11	8933474	8933765
11	9201100	9201328
11	9213581	9214040
11	9216612	9216924
11	9218356	9218731
11	9219550	9220093
11	9222342	9222549
11	9232776	9233109
11	9238427	9238823
11	9239950	9240430
11	9279330	9279558
11	9280421	9280754
11	9289440	9289794
11	9292510	9292780
11	9295651	9295984
11	9311343	9311718
11	9319663	9319912
11	9324351	9324579
11	9325623	9326019
11	9332096	9332450
11	9351751	9352000
11	9398263	9398596
11	9445035	9445368
11	9447104	9447563
11	9449683	9450205
11	9451010	9451322
11	9458002	9458188
11	9459703	9460162
11	9492490	9492760
11	9562012	9562282
11	9570274	9570523
11	9573048	9573507
11	9575987	9576257
11	9578653	9579028
11	9586747	9587080
11	9589885	9590113
11	9668694	9669111
11	9811350	9811662
11	9835933	9836203
11	9839952	9840285
11	9844657	9844990
11	9845708	9846104
11	9851830	9852268
11	9858288	9858621
11	9934855	9934978
11	9936336	9936711
11	9940799	9941195
11	9964167	9964395
11	9969853	9970144
11	10007191	10007482
11	10028484	10028817
11	10646998	10647373
11	15378980	15379292
11	15385061	15385226
11	15388402	15388735
11	15394221	15394449
11	15763417	15763771
11	15860173	15860569
11	15861135	15861468
11	15863903	15864173
11	15865728	15865956
11	15868760	15869135
11	15870751	15871000
11	15871830	15872184
11	16088511	16088928
11	16101021	16101228
11	16103429	16103951
11	16105372	16105747
11	16109376	16109583
11	16113513	16114119
11	16249878	16250295
11	16331020	16331269
11	16367742	16367949
11	16376698	16376947
11	16381576	16382500
11	16382314	16382500
11	16388308	16388683
11	16391230	16391670
11	16392610	16392901
11	16394694	16395006
11	16395791	16396061
11	16400531	16400885
11	16490625	16490979
11	16493133	16493319
11	16520005	16520506
11	16522633	16523050
11	16527097	16527514
11	16531342	16531927
11	16532210	16532585
11	16542897	16543125
11	16544657	16545011
11	16557344	16557719
11	16559079	16559433
11	16561704	16561827
11	16565360	16565588
11	16566117	16566597
11	16583179	16583617
11	16599186	16599414
11	16603155	16603383
11	16605016	16605349
11	16606671	16606941
11	16642313	16642562
11	16645118	16645262
11	16651979	16652375
11	16652714	16653194
11	16654627	16654876
11	16665009	16665321
11	19501187	19501415
11	19502108	19502546
11	19504227	19504537
11	19504951	19505158
11	19505637	19506019
11	22955084	22955291
11	22956289	22956727
11	22978208	22978583
11	22986834	22987062
11	22987467	22987821
11	22988563	22988938
11	22990261	22990531
11	22991469	22991739
11	22992998	22993311
11	22995320	22995695
11	22996862	22997132
11	22998003	22998378
11	22999584	22999770
11	22999766	22999973
11	23000220	23000427
11	23001394	23001811
11	23003564	23003939
11	23005121	23005559
11	23008035	23008137
11	23008589	23008880
11	23009606	23010363
11	23010135	23010321
11	23018987	23019383
11	23019822	23020155
11	23020732	23021128
11	23034479	23034917
11	23035457	23035874
11	23040336	23040606
11	23042042	23042270
11	23042933	23043350
11	23044184	23044622
11	23045414	23045810
11	23052827	23053328
11	23054195	23054633
11	23056166	23056436
11	24240906	24241071
11	24242405	24242843
11	24245265	24245535
11	24246268	24246601
11	24247942	24248233
11	24257297	24257693
11	24258472	24258826
11	24288609	24289104
11	24291373	24291769
11	24293435	24293705
11	24295951	24296305
11	24320104	24320500
11	24321337	24321565
11	24323230	24323458
11	24327268	24327517
11	24329442	24330602
11	24332225	24332516
11	24333429	24333552
11	24335413	24335830
11	24336922	24337129
11	24337793	24338063
11	24340955	24341836
11	24341608	24341836
11	24342951	24343410
11	24344997	24345372
11	24346287	24346662
11	24347072	24347426
11	24349203	24349473
11	24399018	24399267
11	24401308	24401515
11	24404640	24404910
11	24406898	24407231
11	24409118	24409283
11	24411010	24411490
11	24412116	24412533
11	24415519	24415810
11	24417050	24417404
11	24440701	24440929
11	24450964	24451641
11	24451957	24452332
11	24455849	24456287
11	24456723	24457459
11	24458513	24458720
11	24459886	24460114
11	24463582	24463789
11	24465008	24465383
11	24469892	24470099
11	24471574	24471697
11	24568433	24568724
11	24569588	24570130
11	24579358	24579733
11	24600905	24601154
11	24620607	24620835
11	24621688	24622063
11	24622921	24623359
11	24623841	24624111
11	24625280	24625613
11	24631669	24631939
11	24677945	24678278
11	24679923	24680298
11	24680939	24681272
11	24681734	24681920
11	24682644	24682893
11	24683264	24683702
11	24702163	24702391
11	24703624	24703978
11	24707824	24708157
11	24711780	24711987
11	24763000	24763333
11	24764635	24765010
11	24765536	24765974
11	24767311	24767497
11	24769583	24769874
11	24770486	24771463
11	24771193	24771463
11	24773411	24773954
11	24780174	24780738
11	24783515	24783890
11	24786439	24786541
11	24789083	24789560
11	24794035	24794431
11	24795922	24796129
11	24796899	24797127
11	24803440	24803794
11	24804918	24805167
11	24806366	24806594
11	24918583	24918958
11	24919620	24920058
11	24920879	24921191
11	24924204	24924411
11	24925165	24926115
11	24994846	24995347
11	25026872	25027142
11	25046111	25046444
11	25047127	25047376
11	25048309	25048768
11	25049910	25050306
11	25077684	25078080
11	25078877	25079252
11	25080445	25080673
11	25081774	25082086
11	25082770	25083166
11	25084602	25084830
11	25088147	25088438
11	25090138	25090723
11	25091444	25091987
11	25093200	25093575
11	25094061	25094520
11	25095331	25095664
11	25096368	25096785
11	25097859	25097940
11	25099669	25099855
11	25109791	25110223
11	25112195	25112570
11	25118110	25118233
11	25119378	25119648
11	25120043	25120397
11	25123162	25123684
11	25124726	25124996
11	25126434	25126998
11	25128035	25128477
11	25129704	25129995
11	25130821	25131112
11	25132219	25133696
11	25133073	25133301
11	25136914	25137310
11	25138011	25138428
11	25138782	25139325
11	25139925	25140342
11	25142121	25142433
11	25142874	25143207
11	25143591	25144391
11	25143612	25143819
11	25145003	25145420
11	25145807	25146224
11	25147620	25147932
11	26322692	26323214
11	26324245	26325249
11	26324937	26325291
11	26326681	26326909
11	26328521	26328854
11	26331335	26331521
11	26332907	26333198
11	26333858	26334149
11	26335094	26335217
11	26335904	26336782
11	26336491	26336677
11	26338294	26338690
11	26340534	26340678
11	26347991	26348408
11	26348871	26349204
11	26374326	26374701
11	26382189	26382396
11	26384297	26384681
11	26385399	26386028
11	26386778	26386964
11	26387379	26387838
11	26390329	26390767
11	26391786	26392266
11	26394649	26394982
11	26397287	26397725
11	26897130	26897400
12	2274931	2275369
12	2278103	2278478
12	2282119	2282473
12	2283957	2284269
12	3133447	3133822
12	3139705	3139933
12	3141620	3142037
12	3143312	3143708
12	7255995	7256223
12	7555098	7555515
12	7558821	7559196
12	8086281	8086698
12	8088420	8088753
12	8090106	8090502
12	8107332	8107833
12	8110001	8110376
12	8113925	8114216
12	8126379	8126670
12	8128935	8129142
12	8153966	8154320
12	8173436	8173643
12	8180540	8180978
12	8188814	8189042
12	8190190	8190544
12	8237359	8237608
12	8242511	8242823
12	8246823	8247198
12	8265769	8266039
12	8447751	8448126
12	8451080	8451245
12	8705620	8706037
12	8709746	8709995
12	8713740	8714136
12	8745073	8745322
12	8747385	8747634
12	8748395	8748728
12	9185737	9186070
12	9189992	9190367
12	9202105	9202438
12	9207264	9207471
12	9258312	9258540
12	10220828	10221203
12	10222615	10222822
12	10224715	10225153
12	10228672	10228963
12	10269534	10270014
12	10278673	10278985
12	10280644	10280893
12	13957180	13957660
12	13959425	13959884
12	13963809	13964079
12	13970531	13970885
12	13972767	13972974
12	14059302	14059593
12	14061730	14061916
12	14063103	14063457
12	14066499	14066979
12	14097249	14097456
12	14144496	14144892
12	14158680	14158992
12	14159537	14159723
12	14161927	14162302
12	14164806	14165034
12	14165580	14165871
12	14177891	14178350
12	14182105	14182354
12	14290256	14290652
12	14295475	14295808
12	14403893	14404247
12	14459896	14460271
12	14466192	14466651
12	14467502	14468158
12	14543332	14543455
12	14544141	14544432
12	14546701	14547097
12	14548523	14548877
12	14550615	14550822
12	14576191	14576608
12	14598490	14598844
12	14599333	14599666
12	14602223	14602640
12	14603082	14603436
12	14629362	14629653
12	14630969	14631491
12	14661913	14662099
12	14666360	14666546
12	14670293	14670458
12	14677348	14677765
12	14681886	14682198
12	14686970	14687282
12	14695741	14695948
12	14696542	14696854
12	14697199	14697574
12	14699976	14700288
12	14701678	14702011
12	14704437	14704728
12	14930825	14931137
12	14938250	14938688
12	14943524	14943878
12	14944169	14944502
12	14954920	14955169
12	15140842	15141502
12	15155983	15156317
12	15158477	15159072
12	15161085	15161355
12	15162567	15162984
12	15164525	15165005
12	15171687	15172257
12	15176151	15176610
12	15177769	15178207
12	15179030	15179384
12	15187039	15187456
12	15206861	15207257
12	15210923	15211214
12	15212221	15212722
12	15214247	15214643
12	15215647	15216043
12	15218136	15218511
12	15220707	15221082
12	15239699	15240053
12	15246061	15246499
12	15259525	15259984
12	15283727	15284081
12	15288143	15288518
12	15308970	15309345
12	15312449	15312908
12	15317775	15318318
12	15323810	15324143
12	15404470	15404740
12	15414752	15415211
12	15437852	15438059
12	15439048	15439339
12	15457744	15458182
12	15533610	15534302
12	15535484	15535754
12	15538288	15538642
12	15543667	15544000
12	15558925	15559258
12	15561094	15561671
12	15564568	15565137
12	15599867	15600444
12	15602280	15602613
12	15617536	15617869
12	15620187	15620541
12	15623142	15623475
12	15624340	15624631
12	15664640	15664994
12	15667977	15668415
12	16139572	16139989
12	16207948	16208365
12	16210716	16210965
12	16211529	16212114
12	16254177	16254447
12	16258036	16258453
12	16259078	16259411
12	16260920	16261232
12	16280648	16281044
12	16284197	16284467
12	16285241	16285490
12	16288147	16288396
12	16288883	16289237
12	16302976	16303204
12	16310094	16310595
12	16315250	16315730
12	16319607	16320003
12	16323515	16323869
12	16344624	16344957
12	16346471	16347295
12	18006317	18006503
12	18022874	18023375
12	18038952	18039285
12	18040329	18040662
12	18041539	18042103
12	18049116	18049344
12	18051858	18052086
12	18054523	18054772
12	18066427	18066739
12	18069744	18070014
12	18072725	18073425
12	18075153	18075381
12	18076815	18077211
12	18082783	18083032
12	18086634	18087135
12	18087662	18088037
12	18094735	18095110
12	18101967	18102384
12	18176502	18176835
12	18177816	18178191
12	18179402	18179735
12	18203203	18203494
12	18205567	18206026
12	18210399	18210732
12	18264947	18265911
12	18265683	18265911
12	18274845	18275262
12	18276897	18277146
12	18279178	18279637
12	18280355	18280730
12	18281791	18282166
12	18286907	18287408
[truncated: 365 more rows]

## Sheet: README
List of phasiRNA loci coordinates in Os-Nipponbare-Reference-IRGSP-1.0 in BED format
Loci were identified using PHASIS version 3.3 (https://www.biorxiv.org/content/10.1101/158832v1).
The phasdetect module was run on small RNA reads of each length from 20 to 25-nt separately, followed by the phasemerge module, parameters “-mode merge -pval 1e-5” with each length.
In addition to the small RNA reads produced in this study, reads from the spikelet developmental series (Fei et al. 2016), and anther/ovary developmental series (Li et al. 2017) were included for identifying phasiRNA loci.
Only 21 and 24-nt lengths produced detectable phasiRNA loci.
