# Supplementary material for: Genome-wide redistribution of 24-nt siRNAs in rice gametes
Source: HighWire-hosted journal article supplement (doi:10.1101/gr.253674.119), 2020-01-02
Supplement: Supplemental_Table_5.xlsx [file Supplemental_Table_5.xlsx]

## Sheet: small RNA counts 
sample_ID	total reads	siRNAs	miRNAs	tRNAs	NOR RNAs	5S rRNAs	phasiRNAs (21-nt)	phasiRNA (24-nt)	tissue	genotype	source
SP5b	916544	870774	8783	11537	11330	5614	2210	6321	sperm	WT	this study
SP5c	1031616	978165	10643	13107	13272	6474	2712	7263	sperm	WT	this study
BS1	2133241	2045521	15390	17755	16271	9854	4877	23646	sperm	WT	this study
BS2	389985	362946	4974	7006	7467	2382	1262	3951	sperm	WT	this study
BS4a	551321	495075	3148	19398	16893	7474	1638	7699	sperm	WT	this study
BS4b	570030	512159	2815	21007	16522	6931	1707	8925	sperm	WT	this study
BS6a	715023	651401	4070	22285	16128	7378	1959	11908	sperm	WT	this study
BS6b	636751	577784	3753	21912	14409	6944	1663	10326	sperm	WT	this study
B15	7527063	7042806	347772	17475	38204	14784	65062	960	seedling shoot	WT	this study
B20	4547112	4218167	244807	10342	20981	10428	41805	582	seedling shoot	WT	this study
B25	6064654	5656128	304164	13664	23957	12249	53712	781	seedling shoot	WT	this study
SD4	2803541	2518080	194158	19111	38687	5038	24813	3654	seedling shoot	WT	this study
E9a	254941	231572	4824	4427	5978	6509	829	806	egg	WT	this study
E9b	318362	289755	5898	6076	7745	6847	889	1157	egg	WT	this study
E9c	358322	327887	5984	6829	8041	7207	974	1403	egg	WT	this study
E2	1019386	892334	17195	28961	51495	24574	4356	473	egg	WT	this study
E3	498054	441975	8895	18769	16017	9301	2646	452	egg	WT	this study
E4	1104761	997089	23120	20172	32208	25469	6146	558	egg	WT	this study
OV1a	3778186	3607007	60240	7624	75303	9127	16459	2464	ovary	WT	this study
OV1b	3653729	3485267	60487	7700	73071	9061	15716	2460	ovary	WT	this study
OV2	2807214	2681756	58276	10327	36346	5099	13895	1530	ovary	WT	this study
root	31067184	26569248	2742726	310480	1112499	170178	160201	1854	root	WT	Shin et al. 2018
ddm1	34999754	25263859	5993131	883651	2256151	269094	326352	7516	leaf	ddm1ab	Tan et al. 2016
ddm1_con	37860268	26346610	6713890	1168437	2971734	350781	297799	11017	leaf	WT	Tan et al. 2016
drm2	15107095	12051628	685086	278814	1874108	156790	54932	5738	leaf	drm2	Tan et al. 2016
drm2_con	11869815	9424454	770552	180580	1360782	71869	56903	4676	leaf	WT	Tan et al. 2016
an_pre	5612369	2978780	73863	81453	126677	9065	1928356	421899	pre-meiotic anther	WT	Li et al. 2017
an_mei	6595205	3701635	107810	50708	194656	11988	2043736	493729	meiosis anther	WT	Li et al. 2017
an_mic	7293301	4937693	105629	93584	334602	22096	1351366	454074	microspore anther	WT	Li et al. 2017
an_bi	4641046	3669459	69119	185809	453836	17944	229396	16212	bicellular pollen anther	WT	Li et al. 2017
ov_1st	2850134	2221538	120890	73014	231694	8558	193705	1225	megasporocyte ovary	WT	Li et al. 2017
ov_2nd	3653542	2743627	232813	58890	324699	14786	277557	2012	megasporocyte meiosis ovary	WT	Li et al. 2017
ov_3rd	2492728	1965720	147653	78958	163897	7822	126341	2746	functional megaspore ovary	WT	Li et al. 2017
ov_4th	5064236	4366544	175988	75681	328780	21511	91866	4124	8-nuclei embryo sac ovary	WT	Li et al. 2017
S3_1	5249609	4785705	265539	9684	12846	2444	175166	403	spikelets, anther stage 3	WT	Fei et al. 2016
S3_2	5237639	4795981	233033	21324	12385	2416	174163	352	spikelets, anther stage 3	WT	Fei et al. 2016
S3_3	5218458	4784361	237020	32303	14879	2489	148870	380	spikelets, anther stage 3	WT	Fei et al. 2016
S5_1	5234008	3045444	323187	22584	11390	2042	1868608	583	spikelets, anther stage 5	WT	Fei et al. 2016
S5_2	5277048	3006873	330658	13143	9978	1793	1953231	2051	spikelets, anther stage 5	WT	Fei et al. 2016
S5_3	5277285	2932583	282910	17722	6451	1730	2078964	441	spikelets, anther stage 5	WT	Fei et al. 2016
S7_1	4853127	3008214	267884	19095	17564	1615	1273828	295253	spikelets, anther stage 7	WT	Fei et al. 2016
S7_2	4860492	2975818	341509	8509	6175	1079	1379577	178606	spikelets, anther stage 7	WT	Fei et al. 2016
S7_3	4848132	3030565	273254	13670	13960	1439	1244223	301439	spikelets, anther stage 7	WT	Fei et al. 2016
em_dry	15470015	12281484	600612	683048	1710284	108218	85459	917	mature embryo	WT	He et al. 2015
em_12h	21163330	17892239	1694211	287670	1055429	80200	152033	1551	12h imbibed embryo	WT	He et al. 2015
em_24h	16822329	14361822	1532928	217947	548307	40150	119847	1336	24h imbibed embryo	WT	He et al. 2015
en_7DAF	11874742	11437088	246464	38388	91559	17109	43879	256	endosperm 7-8 DAF	WT	Rodrigues et al. 2013
em_7DAF	20717130	19899481	583208	30970	99792	24743	76616	2327	embryo 7-8 DAF	WT	Rodrigues et al. 2013

## Sheet: README
Small RNA counts include all reads from 20 to 25-nt in length that mapped to the genome.
siRNAs are the set of small RNAs not included in the other six categories.
21 and 24-nt phasiRNA loci coordinates are listed in Supplemental Table 4.
